# Supplementary material for: Comprehensive Metabolite Profile Uncovers the Bioactive Components, Antioxidant and Antibacterial Activities in Wild Tree Peony Leaves
Source: MDPI journal article supplement (doi:10.3390/ijms241310609), 2023-06-25

## Supplementary Material

### Supplementary Tables

**Supplementary Table S1.** Bacteria strain standard codes.

| Latin names                                       | bacteria codes |
|---------------------------------------------------|----------------|
| <i>Staphylococcus aureus</i>                      | BNCC 310011    |
| <i>Streptococcus hemolytis-<math>\beta</math></i> | BNCC 102660    |
| <i>Propionibacterium acnes</i>                    | BNCC 336649    |
| <i>Listeria monocytogenes</i>                     | BNCC 185986    |
| <i>Pseudomonas aeruginosa</i>                     | BNCC 337940    |
| <i>Escherichia coli</i>                           | BNCC 269342    |
| <i>Salmonella enterica</i> subsp. <i>enterica</i> | BNCC 333565    |
| <i>Proteus vulgaris</i>                           | BNCC 337267    |

**Supplementary Table S2.** The TPC and TFC of the newly grown leaves of nine wild tree peony species.

|                       | TPC(g GE/100 g DW)       | TFC(g RE/100 g DW)      |
|-----------------------|--------------------------|-------------------------|
| <i>P. jishanensis</i> | 15.83±0.79 <sup>c</sup>  | 10.85±0.78 <sup>b</sup> |
| <i>P. qiui</i>        | 11.39±0.53 <sup>d</sup>  | 13.73±1.17 <sup>a</sup> |
| <i>P. decomposita</i> | 9.68±0.52 <sup>e</sup>   | 8.51±0.22 <sup>c</sup>  |
| <i>P. ostii</i>       | 19.71±0.21 <sup>b</sup>  | 15.16±1.29 <sup>a</sup> |
| <i>P. rockii</i>      | 15.56±1.78 <sup>c</sup>  | 14.28±0.66 <sup>a</sup> |
| <i>P. lutea</i>       | 31.18±1.30 <sup>a</sup>  | 9.08±0.03 <sup>c</sup>  |
| <i>P. delavayi</i>    | 15.987±0.21 <sup>c</sup> | 6.63±0.32 <sup>d</sup>  |
| <i>P. ludlowii</i>    | 12.82±0.20 <sup>d</sup>  | 5.70±1.05 <sup>d</sup>  |
| <i>P. potaninii</i>   | 20.14±0.31 <sup>b</sup>  | 12.02±0.76 <sup>b</sup> |

Data are presented as mean ± SD ( $n = 3$ ). Different superscript letters in each column indicate significant differences ( $P < 0.05$ ).

**Supplementary Table S3.** Identified metabolites of newly grown leaves of nine wild tree peony species.

| NO. | RT  | Compound                   | Formula                                         | Relative content%               |                          |                                 |                           |                            |                |                                          |                              |                               |
|-----|-----|----------------------------|-------------------------------------------------|---------------------------------|--------------------------|---------------------------------|---------------------------|----------------------------|----------------|------------------------------------------|------------------------------|-------------------------------|
|     |     |                            |                                                 | <i>P.</i><br><i>jishanensis</i> | <i>P.</i><br><i>qiui</i> | <i>P.</i><br><i>decomposita</i> | <i>P.osti</i><br><i>i</i> | <i>P.rocki</i><br><i>i</i> | <i>P.lutea</i> | <i>P.</i><br><i>delavayi</i><br><i>i</i> | <i>P.</i><br><i>ludlowii</i> | <i>P.</i><br><i>potaninii</i> |
|     |     | <b>Flavonoids<br/>(27)</b> |                                                 | 33.68                           | 23.30                    | 49.53                           | 82.64                     | 31.92                      | 38.10          | 42.37                                    | 22.20                        | 25.28                         |
| 1   | 7.4 | Luteolin-7-O-β-D-glucoside | C <sub>21</sub> H <sub>20</sub> O <sub>11</sub> | 5.23                            | 6.38                     | 13.68                           | 25.98                     | 15.08                      | 2.71           | 13.66                                    | 7.84                         | 10.48                         |
| 2   | 8.1 | Apigenin-7-glucoside       | C <sub>21</sub> H <sub>20</sub> O <sub>10</sub> | 16.04                           | 11.00                    | 13.64                           | 24.01                     | 0.31                       | 8.39           | 0.06                                     | 0.08                         | 8.02                          |
| 3   | 7.5 | Hyperin                    | C <sub>21</sub> H <sub>20</sub> O <sub>12</sub> | 1.51                            | 0.69                     | 3.63                            | 11.70                     | 11.97                      | 3.51           | 10.25                                    | 7.87                         | 1.53                          |
| 4   | 8.1 | Rhoifolin                  | C <sub>27</sub> H <sub>30</sub> O <sub>14</sub> | 6.15                            | 2.36                     | 9.85                            | 6.76                      | 0.11                       | 14.34          | 0.08                                     | 0.04                         | 1.59                          |
| 5   | 10  | Apigenin                   | C <sub>15</sub> H <sub>10</sub> O <sub>5</sub>  | 0.10                            | 0.07                     | 0.11                            | 0.60                      | tr                         | 1.41           | tr                                       | tr                           | 0.37                          |
| 6   | 7.3 | naringenin                 | C <sub>15</sub> H <sub>12</sub> O <sub>5</sub>  | 0.04                            | 0.03                     | 0.02                            | 0.05                      | 0.01                       | 0.09           | 0.07                                     | 0.04                         | 0.01                          |
| 7   | 9.6 | Luteolin                   | C <sub>15</sub> H <sub>10</sub> O <sub>6</sub>  | 0.14                            | 0.15                     | 0.49                            | 1.70                      | 0.79                       | 0.84           | 2.17                                     | 0.60                         | 0.94                          |

|    |     |                            |                                                 |      |      |      |      |      |      |      |      |      |
|----|-----|----------------------------|-------------------------------------------------|------|------|------|------|------|------|------|------|------|
| 8  | 8.2 | Daidzin                    | C <sub>21</sub> H <sub>20</sub> O <sub>9</sub>  | 0.91 | 1.15 | 2.82 | 4.29 | 0.05 | 0.07 | 0.08 | 0.02 | 0.26 |
| 9  | 5.9 | Kaempferol-3-gentiobioside | C <sub>27</sub> H <sub>30</sub> O <sub>16</sub> | 0.52 | 0.16 | 1.26 | 2.38 | 2.04 | 1.19 | nd   | 1.17 | nd   |
| 10 | 10  | Isorhamnetin               | C <sub>16</sub> H <sub>12</sub> O <sub>7</sub>  | 0.03 | 0.04 | 0.09 | 0.44 | 0.62 | 0.13 | 0.71 | 0.37 | 0.06 |
| 11 | 7.4 | Glucosylvitexin            | C <sub>27</sub> H <sub>30</sub> O <sub>15</sub> | 1.97 | 0.56 | 0.96 | 1.21 | nd   | 1.09 | 0.05 | nd   | 0.68 |
| 12 | 7.9 | Isoschaftoside             | C <sub>26</sub> H <sub>28</sub> O <sub>14</sub> | 0.56 | 0.21 | 0.97 | 0.46 | nd   | 1.25 | 1.86 | nd   | 0.16 |
| 13 | 9.1 | Quercetin dihydrate        | C <sub>15</sub> H <sub>10</sub> O <sub>7</sub>  | 0.03 | 0.05 | 0.08 | 0.49 | 0.91 | 0.40 | 2.27 | 0.56 | 0.12 |
| 14 | 9.6 | cantharidin                | C <sub>10</sub> H <sub>12</sub> O <sub>4</sub>  | nd   | nd   | 0.02 | 0.13 | nd   | 2.49 | 7.54 | 3.56 | 0.88 |
| 15 | 8.2 | spinosin                   | C <sub>28</sub> H <sub>32</sub> O <sub>15</sub> | 0.34 | 0.45 | 1.82 | 1.75 | nd   | 0.14 | nd   | nd   | 0.10 |
| 16 | 8   | eriodictyol                | C <sub>15</sub> H <sub>12</sub> O <sub>6</sub>  | nd   | tr   | tr   | 0.48 | 0.01 | 0.01 | nd   | 0.01 | nd   |
| 17 | 9.2 | dihydroquercetin           | C <sub>15</sub> H <sub>12</sub> O <sub>7</sub>  | nd   | nd   | 0.07 | 0.08 | nd   | 0.02 | nd   | nd   | 0.04 |

|                            |     |                      |               |       |       |       |       |       |       |       |       |       |
|----------------------------|-----|----------------------|---------------|-------|-------|-------|-------|-------|-------|-------|-------|-------|
| 18                         | 11  | Hydroxygen<br>kwanin | C16H12O6      | tr    | 0.01  | 0.03  | 0.10  | tr    | 0.01  | nd    | nd    | tr    |
| 19                         | 8.2 | Dihydromyri<br>cetin | C15H12O8      | tr    | tr    | nd    | 0.03  | tr    | nd    | tr    | tr    | tr    |
| 20                         | 6.8 | Rutin                | C27H30O1<br>6 | nd    | nd    | nd    | nd    | nd    | nd    | 3.55  | nd    | nd    |
| 21                         | 5   | Plantagoside         | C21H22O1<br>2 | 0.10  | nd    | 0.07  |
| 22                         | 13  | Tiliroside           | C30H26O1<br>3 | nd    | 0.03  | nd    |
| 23                         | 11  | Diosmetin            | C16H12O6      | nd    | nd    | nd    | nd    | nd    | 0.01  | nd    | nd    | nd    |
| 24                         | 7.4 | Naringin             | C27H32O1<br>4 | nd    | nd    | nd    | nd    | tr    | nd    | nd    | nd    | nd    |
| 25                         | 7.6 | Myricetin            | C15H10O8      | nd    | nd    | nd    | nd    | nd    | nd    | tr    | nd    | nd    |
| 26                         | 17  | Pectolinarin         | C29H34O1<br>5 | nd    | nd    | nd    | nd    | nd    | nd    | tr    | nd    | nd    |
| 27                         | 8.8 | Chrysin              | C15H10O4      | nd    | tr    | nd    |
| <b>Terpenoids<br/>(49)</b> |     |                      |               | 63.80 | 73.62 | 46.66 | 11.21 | 64.65 | 55.88 | 37.96 | 69.93 | 70.01 |

|    |     |                     |                                                 |       |       |       |       |       |       |       |       |       |
|----|-----|---------------------|-------------------------------------------------|-------|-------|-------|-------|-------|-------|-------|-------|-------|
| 28 | 6.2 | Paeoniflorin        | C <sub>23</sub> H <sub>28</sub> O <sub>11</sub> | 62.91 | 73.10 | 46.51 | 10.74 | 64.43 | 55.76 | 37.73 | 69.37 | 69.86 |
| 29 | 16  | Sclareol Glycol     | C <sub>16</sub> H <sub>30</sub> O <sub>2</sub>  | 0.05  | 0.04  | 0.05  | 0.09  | 0.05  | 0.04  | 0.12  | 0.05  | 0.04  |
| 30 | 9.9 | Benzoylpaeoniflorin | C <sub>30</sub> H <sub>32</sub> O <sub>12</sub> | 0.61  | 0.41  | nd    |
| 31 | 5.5 | Loganin             | C <sub>17</sub> H <sub>26</sub> O <sub>10</sub> | nd    | tr    | nd    | 0.01  | 0.02  | 0.03  | 0.06  | 0.25  | nd    |
| 32 | 5.4 | Bilobalide          | C <sub>15</sub> H <sub>18</sub> O <sub>8</sub>  | 0.03  | 0.02  | 0.01  | 0.06  | 0.02  | nd    | nd    | 0.12  | 0.03  |
| 33 | 5   | Loganin             | C <sub>17</sub> H <sub>26</sub> O <sub>10</sub> | 0.17  | nd    | tr    | 0.07  | 0.02  | nd    | nd    | nd    | nd    |
| 34 | 15  | Sclareolide         | C <sub>16</sub> H <sub>26</sub> O <sub>2</sub>  | nd    | tr    | tr    | 0.03  | 0.03  | nd    | nd    | 0.05  | tr    |
| 35 | 17  | Curcumol            | C <sub>15</sub> H <sub>24</sub> O <sub>2</sub>  | 0.01  | tr    | tr    | 0.01  | 0.01  | tr    | 0.02  | nd    | nd    |
| 36 | 7.2 | Toosendanin         | C <sub>30</sub> H <sub>38</sub> O <sub>11</sub> | tr    | 0.01  | nd    | 0.03  | 0.02  | nd    | nd    | nd    | nd    |
| 37 | 15  | Hederagenin         | C <sub>30</sub> H <sub>48</sub> O <sub>4</sub>  | tr    | nd    | tr    | tr    | 0.02  | tr    | tr    | nd    | tr    |
| 38 | 16  | Betulinic acid      | C <sub>30</sub> H <sub>48</sub> O <sub>3</sub>  | tr    | tr    | 0.01  | nd    | tr    | nd    | nd    | nd    | nd    |

|    |     |                                 |                |    |    |    |    |    |    |      |    |    |
|----|-----|---------------------------------|----------------|----|----|----|----|----|----|------|----|----|
| 39 | 0   | Genipin                         | C11H14O5       | nd | tr | tr | tr | tr | nd | 0.02 | nd | nd |
| 40 | 7.2 | Toosendanin                     | C30H38O1<br>1  | nd | nd | nd | nd | nd | tr | 0.01 | nd | tr |
| 41 | 7   | Dihydroarte<br>misinin          | C15H24O5       | tr | tr | tr | tr | tr | nd | nd   | tr | nd |
| 42 | 18  | Notoginseno<br>side Fe          | C47H80O1<br>7  | tr | tr | nd | nd | nd | nd | nd   | nd | tr |
| 43 | 16  | Kaurenoic<br>acid               | C20H30O2       | nd | tr | nd | nd | nd | tr | nd   | tr | nd |
| 44 | 13  | Carvacrol                       | C10H14O        | tr | tr | tr | tr | nd | nd | nd   | nd | tr |
| 45 | 16  | Tussilagone                     | C23H34O5       | tr | nd | nd | tr | nd | nd | nd   | tr | nd |
| 46 | 9.3 | Lappaconite<br>Hydrobromi<br>de | C32H44N2<br>O8 | nd | tr | nd | tr | nd | nd | nd   | nd | nd |
| 47 | 12  | Linderane                       | C15H16O4       | nd | tr | nd | tr | tr | nd | nd   | nd | nd |
| 48 | 9.3 | Saikosaponi<br>n C              | C48H78O1<br>7  | tr | tr | nd | tr | nd | nd | nd   | tr | nd |
| 49 | 15  | Costunolide                     | C15H20O2       | tr | tr | tr | tr | nd | nd | nd   | nd | tr |

|    |     |                         |               |    |    |      |      |      |    |    |      |      |
|----|-----|-------------------------|---------------|----|----|------|------|------|----|----|------|------|
| 50 | 6.3 | 6-deoxycatalp<br>ol     | C15H22O9      | nd | nd | nd   | nd   | nd   | nd | nd | 0.09 | nd   |
| 51 | 7.9 | pseudolaric<br>acid B   | C23H28O8      | nd | nd | nd   | nd   | nd   | nd | nd | nd   | 0.06 |
| 52 | 16  | Benzoylhyp<br>acoitine  | C31H43NO<br>9 | nd | nd | nd   | 0.11 | nd   | nd | nd | nd   | nd   |
| 53 | 17  | Andrograph<br>olide     | C20H30O5      | nd | nd | 0.03 | nd   | nd   | nd | nd | nd   | nd   |
| 54 | 7.3 | Ginkgolide<br>C         | C20H24O1<br>1 | nd | nd | nd   | nd   | 0.01 | nd | nd | nd   | nd   |
| 55 | 18  | Nardosinone             | C15H22O3      | nd | nd | nd   | nd   | nd   | nd | nd | nd   | 0.01 |
| 56 | 14  | Asiatic acid            | C30H48O5      | nd | nd | nd   | nd   | nd   | tr | nd | nd   | tr   |
| 57 | 11  | Andrograph<br>olide     | C20H30O5      | nd | nd | nd   | tr   | tr   | nd | nd | nd   | nd   |
| 58 | 16  | Glycyrrhetin<br>ic acid | C30H46O4      | nd | tr | nd   | nd   | nd   | nd | nd | nd   | nd   |
| 59 | 11  | Tenuifolin              | C36H56O1<br>2 | nd | nd | nd   | nd   | tr   | nd | nd | tr   | nd   |



|    |     |                         |                |    |    |    |    |    |    |    |    |    |
|----|-----|-------------------------|----------------|----|----|----|----|----|----|----|----|----|
| 60 | 6.1 | Neonuezhen<br>ide       | C31H42O1<br>8  | nd | nd | nd | nd | nd | tr | nd | nd | nd |
| 61 | 7.7 | Ginkgolide<br>A         | C20H24O9       | nd | nd | nd | nd | nd | tr | nd | nd | nd |
| 62 | 5.7 | Artemisinin             | C15H22O5       | nd | nd | tr | nd | nd | tr | nd | nd | nd |
| 63 | 5.4 | Geniposide              | C17H24O1<br>0  | nd | tr | nd | tr | nd | nd | nd | nd | nd |
| 64 | 15  | Atractylenol<br>ide III | C15H20O3       | nd | nd | tr | nd | nd | nd | nd | tr | tr |
| 65 | 9.4 | Paclitaxel              | C47H51NO<br>14 | nd | nd | nd | nd | nd | tr | nd | nd | nd |
| 66 | 16  | Betulinic<br>acid       | C30H48O3       | nd | nd | nd | nd | nd | tr | nd | nd | nd |
| 67 | 14  | Picfeltarraen<br>in IB  | C42H64O1<br>4  | nd | nd | tr | nd | nd | nd | nd | nd | nd |
| 68 | 15  | Raddeanin<br>A          | C47H76O1<br>6  | nd | nd | tr | nd | nd | nd | nd | nd | nd |
| 69 | 6.1 | Atractylenol<br>ide I   | C15H18O2       | nd | nd | nd | tr | nd | nd | nd | nd | nd |

|    |     |                         |               |    |    |    |    |      |      |      |    |    |
|----|-----|-------------------------|---------------|----|----|----|----|------|------|------|----|----|
| 70 | 11  | Pedunculosi<br>de       | C36H58O1<br>0 | nd | nd | nd | nd | tr   | nd   | nd   | nd | nd |
| 71 | 5.9 | Solanesol               | C45H74O       | nd | tr | nd | nd | nd   | nd   | nd   | nd | nd |
| 72 | 16  | Tenacissosi<br>de H     | C42H66O1<br>4 | nd | nd | nd | nd | nd   | nd   | nd   | nd | tr |
| 73 | 18  | Shionone                | C30H50O       | nd | tr | nd | nd | nd   | nd   | nd   | nd | nd |
| 74 | 14  | Phytolaccag<br>enin     | C31H48O7      | nd | tr | nd | nd | nd   | nd   | nd   | nd | nd |
| 75 | 7.8 | Pulegone                | C10H16O       | nd | tr | nd | nd | nd   | nd   | nd   | nd | nd |
| 76 | 8.9 | Limonin                 | C26H30O8      | nd | nd | nd | tr | nd   | nd   | nd   | nd | nd |
|    |     | <b>Quinones<br/>(7)</b> |               | tr | tr | tr | tr | 0.01 | 0.01 | 0.02 | tr | tr |
| 77 | 9.9 | Aurantio-<br>obtusin    | C17H14O7      | nd | nd | nd | nd | tr   | tr   | nd   | nd | tr |
| 78 | 8.2 | Purpurin                | C14H8O5       | nd | nd | nd | nd | tr   | tr   | 0.01 | tr | nd |
| 79 | 5.2 | Plumbagin               | C11H8O3       | nd | tr | tr | nd | tr   | tr   | tr   | nd | tr |
| 80 | 7.4 | Rhein                   | C15H8O6       | nd | nd | tr | nd | nd   | nd   | nd   | nd | nd |

|    |     |                            |          |      |      |      |      |      |      |      |      |      |
|----|-----|----------------------------|----------|------|------|------|------|------|------|------|------|------|
| 81 | 18  | Shikonin                   | C16H16O5 | nd   | nd   | nd   | nd   | tr   | nd   | nd   | nd   | tr   |
| 82 | 10  | 1,8-Dihydroxynthraquinone  | C14H8O4  | nd   | tr   | nd   |
| 83 | 18  | Dictamnine                 | C12H9NO2 | nd   | tr   |
|    |     | <b>Lipids (11)</b>         |          | 0.23 | 0.61 | 0.93 | 1.60 | 1.04 | 1.45 | 3.69 | 1.90 | 0.64 |
| 84 | 16  | Linoleic acid              | C18H32O2 | 0.22 | 0.32 | 0.54 | 1.07 | 0.64 | 1.29 | 3.66 | 1.43 | 0.63 |
| 85 | 8   | Polygalic acid             | C29H44O6 | nd   | 0.28 | 0.34 | 0.52 | 0.37 | nd   | nd   | nd   | nd   |
| 86 | 5.5 | 10-Hydroxy-2-decenoic acid | C10H18O3 | tr   | tr   | 0.01 | nd   | 0.03 | 0.10 | nd   | nd   | nd   |
| 87 | 7   | Pogostone                  | C12H16O4 | nd   | tr   | tr   | nd   | tr   | nd   | 0.01 | nd   | tr   |
| 88 | 17  | Methyl linoleate           | C19H34O2 | nd   | nd   | nd   | tr   | nd   | tr   | tr   | tr   | nd   |
| 89 | 16  | Ganoderic acid H           | C32H44O9 | nd   | 0.36 | nd   |
| 90 | 18  | Tigogenin                  | C27H44O3 | nd   | nd   | 0.05 | nd   | nd   | nd   | nd   | nd   | nd   |

|                          |     |                                   |                                                       |      |      |      |      |      |      |      |      |      |
|--------------------------|-----|-----------------------------------|-------------------------------------------------------|------|------|------|------|------|------|------|------|------|
| 91                       | 15  | Gracillin                         | C <sub>45</sub> H <sub>72</sub> O <sub>17</sub>       | tr   | nd   |
| 92                       | 18  | Sodium<br>glycodeoxyc<br>holate   | C <sub>26</sub> H <sub>42</sub> NN<br>aO <sub>5</sub> | tr   | nd   |
| 93                       | 17  | 10-Gingerol                       | C <sub>21</sub> H <sub>34</sub> O <sub>4</sub>        | nd   | nd   | nd   | tr   | nd   | nd   | nd   | nd   | nd   |
| 94                       | 18  | Anise oil                         | C <sub>10</sub> H <sub>12</sub> O                     | tr   | nd   | tr   | tr   | nd   | 0.05 | 0.01 | 0.11 | tr   |
| <b>Hydrocarbons (10)</b> |     |                                   |                                                       | 0.39 | 0.51 | 0.68 | 0.12 | 0.34 | 0.99 | 6.82 | 0.42 | 2.12 |
| 95                       | 6.2 | Paeonol                           | C <sub>9</sub> H <sub>10</sub> O <sub>3</sub>         | nd   | 0.03 | nd   | 0.10 | 0.12 | 0.70 | 0.16 | 0.05 | 1.21 |
| 96                       | 10  | Heteroclitin<br>D                 | C <sub>27</sub> H <sub>30</sub> O <sub>8</sub>        | 0.39 | 0.45 | 0.67 | nd   | 0.22 | 0.29 | nd   | 0.35 | 0.89 |
| 97                       | 6   | Pinoresinol<br>Diglucoside        | C <sub>32</sub> H <sub>42</sub> O <sub>16</sub>       | nd   | nd   | nd   | nd   | tr   | nd   | 0.06 | 0.02 | 0.02 |
| 98                       | 8.5 | Lobetyolin                        | C <sub>20</sub> H <sub>28</sub> O <sub>8</sub>        | tr   | tr   | 0.01 | 0.02 | nd   | nd   | nd   | nd   | nd   |
| 99                       | 5.6 | Schisandrin<br>C                  | C <sub>22</sub> H <sub>24</sub> O <sub>6</sub>        | nd   | 0.01 | nd   |
| 100                      | 7.3 | Kaempferol-<br>3-o-<br>rutinoside | C <sub>27</sub> H <sub>30</sub> O <sub>15</sub>       | nd   | nd   | nd   | nd   | nd   | nd   | 6.58 | nd   | nd   |

|     |     |                        |           |      |      |      |      |      |      |      |      |      |
|-----|-----|------------------------|-----------|------|------|------|------|------|------|------|------|------|
| 101 | 13  | Erianin                | C18H22O5  | nd   | nd   | nd   | nd   | nd   | nd   | 0.01 | nd   | nd   |
| 102 | 9.6 | Curcumin               | C21H20O6  | nd   | nd   | nd   | nd   | nd   | nd   | tr   | nd   | nd   |
| 103 | 1.2 | Cryptotanshinone       | C19H20O3  | nd   |
| 104 | 7.7 | Resveratrol            | C14H12O3  | nd   | 0.02 | nd   | tr   | nd   | tr   | nd   | tr   | nd   |
|     |     | <b>Glycosides (48)</b> |           | 0.24 | 0.53 | 0.98 | 1.51 | 0.26 | 1.09 | 3.32 | 3.66 | 0.55 |
| 105 | 6.2 | Curculigoside          | C22H26O11 | 0.10 | 0.22 | 0.40 | 0.58 | 0.10 | 0.17 | 0.08 | 0.14 | 0.28 |
| 106 | 5.9 | Complanatoside         | C28H32O16 | nd   | 0.02 | 0.39 | 0.05 | 0.02 | 0.17 | 0.97 | nd   | 0.03 |
| 107 | 5.5 | Sesamoside             | C17H24O12 | nd   | nd   | nd   | nd   | nd   | 0.20 | 0.28 | 0.49 | 0.08 |
| 108 | 5.3 | sweroside              | C16H22O9  | nd   | nd   | nd   | nd   | nd   | 0.21 | nd   | 0.18 | tr   |
| 109 | 9.5 | Harpagoside            | C24H30O11 | nd   | 0.05 | 0.04 | nd   | 0.03 | 0.08 | 0.08 | 0.10 | 0.03 |
| 110 | 7.7 | Phloridzin             | C21H24O10 | 0.03 | 0.13 | nd   | 0.08 | 0.03 | nd   | nd   | nd   | nd   |
| 111 | 5.7 | Gentiopicrin           | C16H20O9  | nd   | nd   | nd   | nd   | nd   | 0.06 | 0.16 | 0.10 | 0.03 |

|     |     |                                          |               |      |      |      |      |      |      |      |      |      |
|-----|-----|------------------------------------------|---------------|------|------|------|------|------|------|------|------|------|
| 112 | 5.4 | Syringin                                 | C17H24O9      | tr   | 0.02 | tr   | 0.24 | tr   | tr   | 0.04 | 0.03 | 0.04 |
| 113 | 1.1 | Dipsacoside<br>B                         | C17H26O1<br>1 | 0.04 | nd   | 0.06 | 0.07 | 0.04 | nd   | nd   | nd   | nd   |
| 114 | 7.1 | (-)-<br>Pinoresinol<br>glucoside         | C26H32O1<br>1 | 0.02 | 0.01 | 0.01 | 0.04 | 0.03 | nd   | 0.03 | 2.34 | 0.01 |
| 115 | 16  | Astragalosid<br>e IV                     | C41H68O1<br>4 | 0.02 | 0.02 | 0.01 | 0.03 | tr   | nd   | nd   | tr   | tr   |
| 116 | 5   | 10-<br>deacetylaspe<br>rulosidic<br>acid | C16H22O1<br>1 | nd   | nd   | nd   | 0.02 | nd   | 0.03 | nd   | 0.04 | nd   |
| 117 | 6.4 | Polydatin                                | C20H22O8      | nd   | 0.03 | 0.01 | nd   | nd   | nd   | nd   | nd   | nd   |
| 118 | 6.8 | Wogonin 7-<br>O-<br>glucuronide          | C22H20O1<br>1 | nd   | tr   | tr   | nd   | tr   | nd   | tr   | tr   | 0.01 |
| 119 | 7.6 | Tracheloside                             | C27H34O1<br>2 | nd   | nd   | tr   | nd   | nd   | nd   | nd   | nd   | 0.02 |
| 120 | 16  | Harpagide                                | C15H24O1<br>0 | nd   | nd   | tr   | tr   | tr   | nd   | tr   | tr   | tr   |
| 121 | 1.1 | Salicin                                  | C13H18O7      | tr   | tr   | tr   | nd   | tr   | nd   | nd   | nd   | nd   |

|     |     |                                  |                                                 |      |      |      |      |    |      |      |      |    |
|-----|-----|----------------------------------|-------------------------------------------------|------|------|------|------|----|------|------|------|----|
| 122 | 17  | Bufotaline                       | C <sub>26</sub> H <sub>36</sub> O <sub>6</sub>  | nd   | nd   | tr   | nd   | nd | nd   | tr   | tr   | nd |
| 123 | 7.1 | Mulberrosid<br>e A               | C <sub>26</sub> H <sub>32</sub> O <sub>14</sub> | nd   | nd   | 0.01 | 0.33 | nd | nd   | 1.59 | nd   | nd |
| 124 | 7.5 | neoeriocitrin                    | C <sub>27</sub> H <sub>32</sub> O <sub>15</sub> | nd   | nd   | nd   | nd   | nd | 0.13 | nd   | 0.02 | nd |
| 125 | 9.8 | Etoposide                        | C <sub>29</sub> H <sub>32</sub> O <sub>13</sub> | nd   | nd   | nd   | nd   | nd | nd   | nd   | 0.10 | nd |
| 126 | 6.3 | Glucosylvite<br>xin              | C <sub>27</sub> H <sub>30</sub> O <sub>15</sub> | nd   | nd   | nd   | nd   | nd | nd   | nd   | 0.08 | nd |
| 127 | 6.2 | Prim-O-<br>glucosylcimi<br>fugin | C <sub>22</sub> H <sub>28</sub> O <sub>11</sub> | 0.02 | nd   | nd   | 0.03 | nd | nd   | nd   | nd   | nd |
| 128 | 6.1 | Arbutin                          | C <sub>12</sub> H <sub>16</sub> O <sub>7</sub>  | nd   | 0.02 | nd   | nd   | nd | nd   | nd   | nd   | nd |
| 129 | 8.7 | calycosin-7-<br>o-glucoside      | C <sub>22</sub> H <sub>22</sub> O <sub>10</sub> | tr   | nd   | nd   | nd   | nd | tr   | 0.02 | nd   | tr |
| 130 | 6.1 | Vaccarin                         | C <sub>32</sub> H <sub>38</sub> O <sub>19</sub> | nd   | nd   | nd   | nd   | nd | 0.02 | nd   | nd   | nd |
| 131 | 5.8 | Catalpol                         | C <sub>15</sub> H <sub>22</sub> O <sub>10</sub> | nd   | nd   | nd   | nd   | nd | nd   | 0.02 | tr   | nd |

|     |     |                                  |                                                 |    |    |    |      |    |    |      |    |    |
|-----|-----|----------------------------------|-------------------------------------------------|----|----|----|------|----|----|------|----|----|
| 132 | 6.2 | Methylhesperidin                 | C <sub>29</sub> H <sub>36</sub> O <sub>15</sub> | tr | nd | nd | 0.02 | nd | nd | nd   | nd | nd |
| 133 | 6.3 | Geniposidic acid                 | C <sub>16</sub> H <sub>22</sub> O <sub>10</sub> | nd | nd | nd | nd   | nd | nd | 0.02 | nd | nd |
| 134 | 9.9 | Icarrin                          | C <sub>33</sub> H <sub>40</sub> O <sub>15</sub> | nd | tr | nd | nd   | nd | nd | nd   | tr | nd |
| 135 | 5.5 | Aucubin                          | C <sub>15</sub> H <sub>22</sub> O <sub>9</sub>  | nd | nd | nd | nd   | nd | nd | 0.02 | nd | nd |
| 136 | 16  | Ziyuglycoside I                  | C <sub>41</sub> H <sub>66</sub> O <sub>13</sub> | tr | tr | nd | nd   | nd | nd | nd   | nd | nd |
| 137 | 15  | Liriope muscari baily saponins C | C <sub>44</sub> H <sub>70</sub> O <sub>17</sub> | nd | nd | tr | nd   | nd | nd | nd   | tr | nd |
| 138 | 5   | Nodakenin                        | C <sub>20</sub> H <sub>24</sub> O <sub>9</sub>  | nd | tr | tr | nd   | nd | nd | nd   | nd | nd |
| 139 | 6.3 | Asperuloside                     | C <sub>18</sub> H <sub>22</sub> O <sub>11</sub> | nd | nd | nd | 0.02 | nd | nd | nd   | nd | nd |
| 140 | 17  | Pseuoginsenoside F11             | C <sub>42</sub> H <sub>72</sub> O <sub>14</sub> | nd | tr | nd | nd   | nd | tr | nd   | nd | tr |
| 141 | 19  | Pseudoginsenoside-RT5            | C <sub>36</sub> H <sub>62</sub> O <sub>10</sub> | nd | nd | nd | nd   | nd | tr | nd   | nd | nd |



|     |     |                                                                                             |                                                 |    |    |    |    |    |    |    |    |    |
|-----|-----|---------------------------------------------------------------------------------------------|-------------------------------------------------|----|----|----|----|----|----|----|----|----|
| 142 | 6.2 | Swertimarin                                                                                 | C <sub>16</sub> H <sub>22</sub> O <sub>10</sub> | nd | nd | nd | tr | nd | nd | nd | nd | nd |
| 143 | 17  | Notoginsenoside Ft1                                                                         | C <sub>47</sub> H <sub>80</sub> O <sub>17</sub> | nd | nd | nd | nd | nd | nd | tr | nd | nd |
| 144 | 8.3 | Secoisolariciresinol diglucoside                                                            | C <sub>32</sub> H <sub>46</sub> O <sub>16</sub> | nd | nd | nd | nd | nd | nd | tr | nd | nd |
| 145 | 18  | Ophiogenin 3-O- $\alpha$ -L-rhamnopyranosyl-(1 $\rightarrow$ 2)- $\beta$ -D-glucopyranoside | C <sub>39</sub> H <sub>62</sub> O <sub>14</sub> | nd | nd | nd | nd | tr | nd | nd | nd | nd |
| 146 | 6.3 | Orcinol glucosid                                                                            | C <sub>13</sub> H <sub>18</sub> O <sub>7</sub>  | nd | nd | nd | tr | nd | nd | nd | nd | nd |
| 147 | 14  | Neoandrographolide                                                                          | C <sub>26</sub> H <sub>40</sub> O <sub>8</sub>  | nd | tr | nd |
| 148 | 15  | Asperosaponin VI                                                                            | C <sub>47</sub> H <sub>76</sub> O <sub>18</sub> | tr | nd |
| 149 | 8.4 | Phillyrin\For sythin                                                                        | C <sub>27</sub> H <sub>34</sub> O <sub>11</sub> | nd | nd | nd | nd | tr | nd | nd | nd | nd |

|     |     |                              |                                                 |      |      |      |      |      |      |      |      |      |
|-----|-----|------------------------------|-------------------------------------------------|------|------|------|------|------|------|------|------|------|
| 150 | 18  | Saikosaponin B2              | C <sub>42</sub> H <sub>68</sub> O <sub>13</sub> | nd   | tr   | nd   |
| 151 | 19  | $\alpha$ -hederin            | C <sub>41</sub> H <sub>66</sub> O <sub>12</sub> | nd   | tr   | nd   |
| 152 | 0.1 | Salidroside                  | C <sub>14</sub> H <sub>20</sub> O <sub>7</sub>  | nd   | nd   | nd   | nd   | nd   | nd   | tr   | nd   | nd   |
|     |     | <b>Carboxylic Acids (21)</b> |                                                 | 1.43 | 0.93 | 0.73 | 1.82 | 1.11 | 1.72 | 3.26 | 1.10 | 0.62 |
| 153 | 1.1 | quinic acid                  | C <sub>7</sub> H <sub>12</sub> O <sub>6</sub>   | 1.26 | 0.59 | 0.47 | 1.38 | 0.54 | 0.78 | 1.16 | 0.12 | 0.30 |
| 154 | 1.1 | Gallic acid                  | C <sub>7</sub> H <sub>6</sub> O <sub>5</sub>    | 0.07 | 0.03 | 0.03 | 0.11 | 0.09 | 0.19 | 0.49 | 0.14 | 0.07 |
| 155 | 1.2 | Citric acid                  | C <sub>6</sub> H <sub>8</sub> O <sub>7</sub>    | nd   | 0.11 | 0.14 | 0.26 | 0.26 | 0.38 | 0.25 | 0.36 | 0.09 |
| 156 | 1.2 | malic acid                   | C <sub>4</sub> H <sub>6</sub> O <sub>5</sub>    | nd   | 0.10 | nd   | nd   | 0.13 | 0.32 | 0.56 | 0.43 | 0.12 |
| 157 | 5.2 | protocatechuic acid          | C <sub>7</sub> H <sub>6</sub> O <sub>4</sub>    | 0.03 | 0.04 | 0.05 | nd   | 0.08 | 0.01 | 0.09 | 0.03 | nd   |
| 158 | 18  | Ethyl ferulate               | C <sub>12</sub> H <sub>14</sub> O <sub>4</sub>  | tr   | tr   | 0.01 | 0.02 | tr   | tr   | 0.01 | tr   | nd   |
| 159 | 0.1 | Hydroxycitric acid           | C <sub>6</sub> H <sub>8</sub> O <sub>8</sub>    | 0.01 | nd   | nd   | nd   | 0.01 | tr   | tr   | nd   | tr   |
| 160 | 6.5 | Danshensu                    | C <sub>9</sub> H <sub>10</sub> O <sub>5</sub>   | nd   | nd   | nd   | tr   | tr   | 0.01 | nd   | nd   | nd   |

|     |     |                                   |               |      |    |    |      |    |      |      |    |      |
|-----|-----|-----------------------------------|---------------|------|----|----|------|----|------|------|----|------|
| 161 | 17  | Euphorbiast<br>eroid              | C32H40O8      | tr   | nd | nd | nd   | nd | nd   | tr   | tr | nd   |
| 162 | 6.7 | p-Coumaric<br>acid                | C9H8O3        | nd   | nd | nd | nd   | nd | 0.01 | 0.37 | nd | nd   |
| 163 | 9.6 | Vanillic acid                     | C8H8O4        | nd   | nd | nd | nd   | nd | nd   | 0.26 | nd | nd   |
| 164 | 7.8 | salicylic<br>acid                 | C7H6O3        | nd   | nd | nd | nd   | nd | nd   | nd   | nd | 0.04 |
| 165 | 8.4 | 3,4-<br>Dimethoxyb<br>enzoic acid | C9H10O4       | nd   | nd | nd | nd   | nd | nd   | 0.06 | nd | nd   |
| 166 | 7.7 | p-Anisic<br>acid                  | C8H8O3        | 0.02 | nd | nd | nd   | nd | nd   | nd   | nd | nd   |
| 167 | 9.6 | 2-<br>Methoxycin<br>amic acid     | C10H10O3      | nd   | nd | nd | 0.04 | nd | nd   | nd   | nd | nd   |
| 168 | 8.6 | Cichoric<br>acid                  | C22H18O1<br>2 | tr   | nd | nd | nd   | nd | nd   | nd   | tr | nd   |
| 169 | 6.1 | 3,6'—<br>Disinapoyl<br>sucrose    | C34H42O1<br>9 | nd   | nd | nd | nd   | nd | nd   | nd   | tr | nd   |
| 170 | 0   | Ferulic Acid                      | C10H10O4      | tr   | nd | tr | nd   | nd | nd   | nd   | nd | nd   |

|     |     |                                |                                                 |      |      |      |      |      |      |      |      |      |
|-----|-----|--------------------------------|-------------------------------------------------|------|------|------|------|------|------|------|------|------|
| 171 | 12  | Chlorogenic acid               | C <sub>16</sub> H <sub>18</sub> O <sub>9</sub>  | nd   | tr   | tr   | nd   | nd   | nd   | nd   | nd   | nd   |
| 172 | 6.3 | Phenprobamate                  | C <sub>9</sub> H <sub>11</sub> NO <sub>2</sub>  | nd   | tr   | nd   | nd   | nd   | nd   | nd   | nd   | tr   |
| 173 | 6.1 | Epicatechin gallate            | C <sub>22</sub> H <sub>18</sub> O <sub>10</sub> | 0.02 | 0.05 | 0.02 | nd   | nd   | nd   | nd   | nd   | nd   |
|     |     | <b>Benzopyrans (27)</b>        |                                                 | 0.03 | 0.12 | 0.02 | 0.09 | 0.11 | 0.14 | 0.14 | 0.14 | 0.05 |
| 174 | 7.8 | Ellagic Acid                   | C <sub>14</sub> H <sub>6</sub> O <sub>8</sub>   | nd   | 0.10 | nd   | 0.04 | 0.06 | nd   | nd   | nd   | 0.04 |
| 175 | 9.4 | Hamaudol Glycoside             | C <sub>21</sub> H <sub>26</sub> O <sub>10</sub> | tr   | nd   | nd   | nd   | nd   | 0.08 | 0.11 | 0.09 | nd   |
| 176 | 5.4 | Isopimpinellin                 | C <sub>13</sub> H <sub>10</sub> O <sub>5</sub>  | nd   | nd   | nd   | nd   | nd   | 0.02 | 0.01 | 0.02 | nd   |
| 177 | 19  | Liquiritigenin                 | C <sub>15</sub> H <sub>12</sub> O <sub>4</sub>  | nd   | nd   | tr   | nd   | 0.01 | tr   | 0.01 | 0.03 | nd   |
| 178 | 5.1 | 3-N-butyl-4,5-dihydrophthalide | C <sub>12</sub> H <sub>16</sub> O <sub>2</sub>  | nd   | tr   | tr   | tr   | tr   | tr   | nd   | nd   | nd   |
| 179 | 7   | Cimifugin                      | C <sub>16</sub> H <sub>18</sub> O <sub>6</sub>  | tr   | nd   | tr   | 0.03 | nd   | nd   | nd   | nd   | nd   |

|     |     |                                 |                        |      |    |    |    |      |    |    |    |    |
|-----|-----|---------------------------------|------------------------|------|----|----|----|------|----|----|----|----|
| 180 | 5.5 | Baicalin                        | <chem>C21H18O11</chem> | 0.01 | nd | nd | nd | nd   | nd | nd | nd | nd |
| 181 | 7   | 6-hydroxy-7,8-dimethoxycoumarin | <chem>C11H10O5</chem>  | nd   | nd | nd | tr | tr   | tr | tr | nd | tr |
| 182 | 5   | Epicatechin                     | <chem>C15H14O6</chem>  | nd   | tr | nd | tr | nd   | tr | nd | nd | nd |
| 183 | 6.8 | Marmesin                        | <chem>C14H14O4</chem>  | nd   | nd | nd | tr | tr   | tr | nd | tr | nd |
| 184 | 9.4 | Wedelolactone                   | <chem>C16H10O7</chem>  | tr   | tr | nd | nd | tr   | tr | nd | nd | nd |
| 185 | 0   | 6,7-Dimethoxycoumarin           | <chem>C11H10O4</chem>  | tr   | tr | tr | tr | tr   | nd | nd | nd | nd |
| 186 | 5.8 | Fraxin                          | <chem>C16H18O10</chem> | nd   | tr | tr | tr | nd   | nd | nd | nd | nd |
| 187 | 5.7 | 4-Hydroxycoumarin               | <chem>C9H6O3</chem>    | tr   | tr | nd | nd | tr   | nd | nd | nd | nd |
| 188 | 12  | Pectolinarigenin                | <chem>C17H14O6</chem>  | nd   | tr | nd | nd | tr   | nd | nd | nd | nd |
| 189 | 5.3 | Bergenium                       | <chem>C14H16O9</chem>  | nd   | nd | nd | nd | 0.01 | tr | nd | nd | nd |

|                         |     |                  |                                                 |    |      |      |      |      |      |      |      |      |
|-------------------------|-----|------------------|-------------------------------------------------|----|------|------|------|------|------|------|------|------|
| 190                     | 6   | Fraxin           | C <sub>16</sub> H <sub>18</sub> O <sub>10</sub> | nd | nd   | nd   | nd   | nd   | nd   | nd   | nd   | 0.01 |
| 191                     | 11  | Oxypeucedanin    | C <sub>16</sub> H <sub>14</sub> O <sub>5</sub>  | nd | nd   | nd   | nd   | nd   | 0.01 | nd   | nd   | nd   |
| 192                     | 12  | 6-Methylcoumarin | C <sub>10</sub> H <sub>8</sub> O <sub>2</sub>   | nd | nd   | nd   | nd   | tr   | tr   | nd   | nd   | nd   |
| 193                     | 1.1 | Catechin         | C <sub>15</sub> H <sub>14</sub> O <sub>6</sub>  | tr | nd   | nd   | nd   | tr   | nd   | nd   | nd   | nd   |
| 194                     | 5.2 | Fraxetin         | C <sub>10</sub> H <sub>8</sub> O <sub>5</sub>   | nd | nd   | tr   | nd   | tr   | nd   | nd   | nd   | tr   |
| 195                     | 6.4 | Osthole          | C <sub>15</sub> H <sub>16</sub> O <sub>3</sub>  | nd | nd   | tr   | tr   | tr   | nd   | tr   | tr   | nd   |
| 196                     | 6.4 | Esculetin        | C <sub>9</sub> H <sub>6</sub> O <sub>4</sub>    | nd | tr   | nd   | nd   | nd   | nd   | nd   | nd   | tr   |
| 197                     | 5.5 | Cistanoside D    | C <sub>31</sub> H <sub>40</sub> O <sub>15</sub> | nd | nd   | nd   | nd   | nd   | nd   | nd   | nd   | tr   |
| 198                     | 7.6 | fraxinellone     | C <sub>14</sub> H <sub>16</sub> O <sub>3</sub>  | nd | nd   | nd   | tr   | nd   | tr   | nd   | nd   | nd   |
| 199                     | 11  | Brazilin         | C <sub>16</sub> H <sub>14</sub> O <sub>5</sub>  | nd | tr   | nd   |
| 200                     | 7.6 | Imperatorin      | C <sub>16</sub> H <sub>14</sub> O <sub>4</sub>  | nd | nd   | nd   | nd   | nd   | nd   | nd   | tr   | nd   |
| <b>Amino Acids (10)</b> |     |                  |                                                 | tr | 0.02 | 0.04 | 0.03 | 0.06 | 0.03 | 0.10 | 0.07 | 0.38 |

|     |     |                       |            |      |      |      |      |      |      |      |      |      |
|-----|-----|-----------------------|------------|------|------|------|------|------|------|------|------|------|
| 201 | 1   | Aspartic acid         | C4H7NO4    | tr   | nd   | tr   | tr   | tr   | tr   | 0.01 | tr   | 0.26 |
| 202 | 1.2 | Proline               | C5H9NO2    | nd   | nd   | nd   | nd   | nd   | nd   | tr   | tr   | 0.10 |
| 203 | 1.1 | Amber Acid            | C4H6O4     | nd   | nd   | tr   | 0.02 | 0.02 | 0.01 | 0.03 | 0.03 | tr   |
| 204 | 1   | Glutamic acid         | C5H9NO4    | nd   | 0.02 | 0.02 | nd   | 0.02 | tr   | 0.02 | 0.02 | tr   |
| 205 | 4.8 | L-Tryptophan          | C11H12N2O2 | tr   | nd   | tr   | nd   | tr   | tr   | 0.01 | 0.01 | tr   |
| 206 | 1   | Serine                | C3H7NO3    | nd   | tr   |
| 207 | 1.2 | Leucine               | C6H13NO2   | nd   | tr   | nd   | tr   | tr   | nd   | tr   | nd   | tr   |
| 208 | 6.7 | L(+)-Arginine         | C6H14N4O2  | nd   | nd   | nd   | tr   | tr   | nd   | tr   | nd   | nd   |
| 209 | 16  | Histidine             | C6H9N3O2   | tr   | nd   | tr   | nd   | nd   | nd   | nd   | nd   | nd   |
| 210 | 18  | Citrulline            | C6H13N3O3  | nd   | tr   |
|     |     | <b>Alkaloids (15)</b> |            | 0.01 | 0.02 | 0.03 | tr   | 0.03 | 0.03 | 0.02 | 0.01 | 0.02 |
| 211 | 9.1 | Irinotecan            | C33H38N4O6 | tr   | tr   | nd   | nd   | 0.03 | nd   | nd   | nd   | nd   |

|     |     |                     |                                                                  |    |    |      |    |    |      |      |    |      |
|-----|-----|---------------------|------------------------------------------------------------------|----|----|------|----|----|------|------|----|------|
| 212 | 17  | (+)-<br>Tetrandrine | C <sub>38</sub> H <sub>42</sub> N <sub>2</sub><br>O <sub>6</sub> | nd | tr | nd   | nd | nd | nd   | 0.01 | tr | tr   |
| 213 | 16  | Catharanthin<br>e   | C <sub>21</sub> H <sub>24</sub> N <sub>2</sub><br>O <sub>2</sub> | nd | tr | nd   | tr | tr | nd   | nd   | nd | tr   |
| 214 | 11  | Canadine            | C <sub>20</sub> H <sub>21</sub> NO<br>4                          | nd | nd | nd   | nd | nd | tr   | tr   | nd | nd   |
| 215 | 5.6 | Topotecan           | C <sub>23</sub> H <sub>23</sub> N <sub>3</sub><br>O <sub>5</sub> | tr | nd | nd   | nd | nd | nd   | nd   | nd | 0.01 |
| 216 | 16  | Caffeine            | C <sub>8</sub> H <sub>10</sub> N <sub>4</sub> O<br>2             | nd | nd | nd   | nd | nd | 0.02 | nd   | nd | tr   |
| 217 | 9.3 | Reserpine           | C <sub>33</sub> H <sub>40</sub> N <sub>2</sub><br>O <sub>9</sub> | nd | tr | 0.02 | nd | nd | nd   | nd   | nd | nd   |
| 218 | 0.1 | Trigonelline        | C <sub>7</sub> H <sub>7</sub> NO <sub>2</sub>                    | nd | nd | tr   | nd | nd | tr   | nd   | nd | nd   |
| 219 | 8   | Colchicine          | C <sub>22</sub> H <sub>25</sub> NO<br>6                          | nd | nd | nd   | nd | nd | tr   | nd   | tr | nd   |
| 220 | 8   | Gramine             | C <sub>11</sub> H <sub>14</sub> N <sub>2</sub>                   | tr | nd | nd   | nd | tr | tr   | nd   | nd | nd   |
| 221 | 10  | Sophoridine         | C <sub>15</sub> H <sub>24</sub> N <sub>2</sub><br>O              | nd | nd | nd   | tr | nd | nd   | nd   | nd | nd   |
| 222 | 7.8 | Abrine              | C <sub>12</sub> H <sub>14</sub> O <sub>2</sub><br>N <sub>2</sub> | nd | nd | nd   | nd | nd | nd   | nd   | tr | nd   |



|     |     |                               |                                                                      |    |      |      |      |      |      |    |      |    |
|-----|-----|-------------------------------|----------------------------------------------------------------------|----|------|------|------|------|------|----|------|----|
| 223 | 8.2 | Lycorine                      | C <sub>16</sub> H <sub>17</sub> NO <sub>4</sub>                      | nd | nd   | nd   | nd   | tr   | nd   | nd | nd   | nd |
| 224 | 10  | Peimisine                     | C <sub>27</sub> H <sub>41</sub> NO <sub>3</sub>                      | nd | nd   | nd   | nd   | nd   | nd   | nd | nd   | tr |
| 225 | 5.3 | Higenamine                    | C <sub>16</sub> H <sub>17</sub> NO <sub>3</sub>                      | nd | nd   | tr   | nd   | nd   | nd   | nd | nd   | nd |
|     |     | <b>Vitamins<br/>(7)</b>       |                                                                      | tr | 0.02 | 0.23 | 0.49 | 0.25 | 0.19 | tr | 0.15 | tr |
| 226 | 5.1 | Vitamin C                     | C <sub>6</sub> H <sub>8</sub> O <sub>6</sub>                         | nd | nd   | 0.22 | 0.48 | 0.25 | 0.19 | nd | 0.03 | nd |
| 227 | 7.6 | Vitamin B5                    | C <sub>18</sub> H <sub>32</sub> Ca<br>N <sub>2</sub> O <sub>10</sub> | nd | 0.02 | nd   | 0.01 | tr   | nd   | nd | 0.12 | nd |
| 228 | 16  | Vitamin A<br>acid             | C <sub>20</sub> H <sub>28</sub> O <sub>2</sub>                       | tr | tr   | tr   | nd   | tr   | tr   | nd | nd   | nd |
| 229 | 0.1 | Arecoline<br>hydrobromid<br>e | C <sub>8</sub> H <sub>13</sub> NO <sub>2</sub>                       | nd | tr   | nd   | tr   | nd   | nd   | nd | tr   | nd |
| 230 | 0   | Nicotinic<br>acid             | C <sub>6</sub> H <sub>5</sub> NO <sub>2</sub>                        | tr | nd   | tr   | nd   | nd   | nd   | nd | nd   | nd |
| 231 | 11  | Menadione<br>(Vitamin<br>K3)  | C <sub>11</sub> H <sub>10</sub> O <sub>5</sub><br>S                  | nd | nd   | nd   | nd   | tr   | nd   | nd | nd   | nd |

|     |     |                                                |                     |    |    |    |      |      |    |      |    |    |    |
|-----|-----|------------------------------------------------|---------------------|----|----|----|------|------|----|------|----|----|----|
|     |     |                                                | Bisulfurous<br>Acid |    |    |    |      |      |    |      |    |    |    |
| 232 | 5.1 | Vitamin B6                                     | C8H11NO3            | nd | nd | nd | nd   | nd   | tr | nd   | nd | nd | nd |
|     |     | <b>Phenolic<br/>acids (2)</b>                  |                     | tr | tr | tr | tr   | tr   | tr | tr   | tr | tr | tr |
| 233 | 6.7 | Benzoic acid                                   | C10H12O5            | nd | tr | tr | tr   | tr   | nd | nd   | nd | nd | nd |
| 234 | 6.8 | Caffeic acid                                   | C9H8O4              | tr | nd | nd | nd   | tr   | nd | nd   | nd | nd | nd |
|     |     | <b>Heterocycli<br/>c<br/>Compounds<br/>(6)</b> |                     | tr | tr | tr | 0.07 | 0.03 | tr | 2.25 | tr | tr | tr |
| 235 | 15  | Levistilide<br>A                               | C24H28O4            | tr | tr | tr | 0.01 | tr   | nd | nd   | nd | tr | tr |
| 236 | 8.2 | Agarotetrol                                    | C17H18O6            | nd | nd | nd | 0.06 | 0.02 | nd | 2.25 | nd | nd | nd |
| 237 | 15  | Gambogic<br>acid                               | C38H44O8            | nd | tr | nd | nd   | nd   | nd | nd   | nd | nd | nd |
| 238 | 1.1 | Pipecolinic<br>acid                            | C6H11NO2            | nd | nd | nd | tr   | nd   | nd | nd   | nd | nd | nd |
| 239 | 6.8 | Phellodendri<br>ne                             | C20H23NO<br>4       | nd | nd | nd | nd   | tr   | nd | nd   | nd | nd | nd |

|     |     |                              |                                                             |      |      |      |      |      |      |      |      |      |
|-----|-----|------------------------------|-------------------------------------------------------------|------|------|------|------|------|------|------|------|------|
| 240 | 7   | Thymine                      | C <sub>5</sub> H <sub>6</sub> N <sub>2</sub> O <sub>2</sub> | nd   | tr   |
|     |     | <b>Aldehydes (5)</b>         |                                                             | 0.02 | 0.03 | 0.08 | 0.03 | 0.05 | tr   | 0.02 | 0.02 | tr   |
| 241 | 7.7 | Isovanillin                  | C <sub>8</sub> H <sub>8</sub> O <sub>3</sub>                | nd   | 0.02 | 0.08 | nd   | 0.05 | nd   | nd   | nd   | nd   |
| 242 | 1.1 | 5-Hydroxymethylfurfural      | C <sub>6</sub> H <sub>6</sub> O <sub>3</sub>                | 0.02 | tr   | nd   | 0.03 | nd   | nd   | nd   | nd   | nd   |
| 243 | 8.4 | Syringaldehyde               | C <sub>9</sub> H <sub>10</sub> O <sub>4</sub>               | nd   | 0.02 | nd   |
| 244 | 7.8 | Helicid                      | C <sub>13</sub> H <sub>16</sub> O <sub>7</sub>              | nd   | nd   | nd   | nd   | nd   | nd   | 0.02 | nd   | nd   |
| 245 | 0.1 | Anisaldehyde                 | C <sub>8</sub> H <sub>8</sub> O <sub>2</sub>                | nd   | tr   | nd   | nd   | tr   | nd   | nd   | nd   | nd   |
|     |     | <b>Ketones (3)</b>           |                                                             | 0.09 | 0.27 | 0.06 | 0.26 | 0.12 | 0.31 | tr   | 0.34 | 0.25 |
| 246 | 8.2 | (tb-B3) 7-O-methylmangiferin | C <sub>20</sub> H <sub>20</sub> O <sub>11</sub>             | 0.09 | 0.25 | 0.06 | 0.24 | 0.12 | 0.31 | nd   | 0.33 | 0.25 |
| 247 | 9.5 | Agrimol B                    | C <sub>37</sub> H <sub>46</sub> O <sub>12</sub>             | nd   | 0.02 | nd   | 0.02 | nd   | nd   | nd   | nd   | nd   |

|     |     |                         |           |      |    |      |      |      |      |      |      |      |
|-----|-----|-------------------------|-----------|------|----|------|------|------|------|------|------|------|
| 248 | 12  | Raspberry ketone        | C10H12O2  | nd   | tr | tr   | tr   | tr   | nd   | nd   | 0.01 | nd   |
|     |     | <b>Phytosterols (2)</b> |           | nd   | tr | nd   | nd   | tr   | nd   | nd   | nd   | nd   |
| 249 | 6.1 | Epibrassinolide         | C28H48O6  | nd   | tr | nd   |
| 250 | 16  | Hydroxyecdysone         | C27H44O7  | nd   | nd | nd   | nd   | tr   | nd   | nd   | nd   | nd   |
|     |     | <b>Others (26)</b>      |           | 0.05 | tr | 0.02 | 0.09 | 0.03 | 0.06 | 0.04 | 0.05 | 0.06 |
| 251 | 6.2 | Hydroxytyrosol          | C8H10O3   | tr   | nd | tr   | tr   | tr   | nd   | nd   | nd   | 0.02 |
| 252 | 5.9 | Tyrosol                 | C8H10O2   | tr   | nd | tr   | tr   | tr   | nd   | nd   | tr   | nd   |
| 253 | 4.8 | bomyl acetate           | C12H20O2  | tr   | tr | tr   | nd   | tr   | tr   | tr   | nd   | tr   |
| 254 | 9.3 | Ligustilide             | C12H14O2  | nd   | tr | nd   |
| 255 | 12  | Isomucronulato          | C17H18O5  | nd   | nd | tr   | 0.02 | nd   | nd   | nd   | nd   | nd   |
| 256 | 16  | Liriopesides B          | C39H62O12 | tr   | nd | tr   | tr   | tr   | tr   | nd   | nd   | nd   |

|     |     |                                                                          |                                                     |      |    |    |      |    |      |      |      |      |
|-----|-----|--------------------------------------------------------------------------|-----------------------------------------------------|------|----|----|------|----|------|------|------|------|
| 257 | 15  | Nobiletin                                                                | C <sub>21</sub> H <sub>22</sub> O <sub>8</sub>      | tr   | nd | tr | nd   | tr | nd   | nd   | nd   | nd   |
| 258 | 9.7 | Cistanoside<br>C                                                         | C <sub>30</sub> H <sub>38</sub> O <sub>15</sub>     | nd   | nd | nd | nd   | nd | 0.04 | nd   | nd   | 0.03 |
| 259 | 1.1 | (tb-C1)<br>PolygalaxanthoneVI                                            | C <sub>23</sub> H <sub>26</sub> O <sub>12</sub>     | 0.03 | nd | nd | nd   | nd | nd   | nd   | nd   | nd   |
| 260 | 8.3 | epimeredinoside A                                                        | C <sub>31</sub> H <sub>40</sub> O <sub>15</sub>     | nd   | nd | nd | nd   | nd | 0.02 | nd   | 0.02 | nd   |
| 261 | 17  | 8-Gingerol                                                               | C <sub>19</sub> H <sub>30</sub> O <sub>4</sub>      | nd   | nd | nd | 0.05 | nd | nd   | nd   | nd   | nd   |
| 262 | 4.7 | α-Mangostin                                                              | C <sub>24</sub> H <sub>26</sub> O <sub>6</sub>      | nd   | nd | nd | nd   | nd | nd   | 0.03 | nd   | nd   |
| 263 | 9.4 | Sodium<br>Taurocholate                                                   | C <sub>26</sub> H <sub>44</sub> NNaO <sub>7</sub> S | nd   | nd | nd | 0.01 | tr | nd   | nd   | nd   | nd   |
| 264 | 20  | D-Sorbitol                                                               | C <sub>6</sub> H <sub>14</sub> O <sub>6</sub>       | tr   | tr | nd | nd   | nd | nd   | tr   | nd   | nd   |
| 265 | 9   | (-)-<br>Syringaresnol-4-O-β-D-<br>apiofuranosyl-(1→2)-β-D-<br>glucopyran | C <sub>33</sub> H <sub>44</sub> O <sub>17</sub>     | nd   | nd | nd | nd   | nd | nd   | nd   | tr   | nd   |

|     |     |                                  |                 |    |    |    |    |      |    |    |      |      |
|-----|-----|----------------------------------|-----------------|----|----|----|----|------|----|----|------|------|
| 266 | 5.4 | Drcorhodin<br>perchlorate        | C17H14O3        | nd | nd | nd | nd | nd   | nd | nd | tr   | nd   |
| 267 | 7.6 | Levodopa                         | C9H11NO4        | nd | nd | nd | tr | nd   | nd | nd | nd   | nd   |
| 268 | 13  | Scopolamine<br>Hydrobromi<br>de  | C17H21NO<br>4   | nd | nd | nd | nd | nd   | nd | nd | tr   | nd   |
| 269 | 14  | Tauroursode<br>oxycholic<br>acid | C26H45NO<br>6S  | nd | nd | nd | nd | nd   | nd | nd | nd   | tr   |
| 270 | 10  | Phenobarbit<br>al                | C12H12N2<br>O3  | nd | nd | nd | nd | nd   | nd | nd | tr   | nd   |
| 271 | 6.6 | Atropine<br>sulfate              | C17H23NO<br>3   | tr | nd | nd | nd | nd   | nd | nd | nd   | nd   |
| 272 | 9.7 | 4-<br>Hydroxytolb<br>utamide     | C12H18N2<br>O4S | nd | nd | tr | nd | nd   | nd | nd | nd   | nd   |
| 273 | 5.3 | Esculin<br>hydrate               | C15H16O9        | nd | nd | nd | nd | nd   | nd | nd | 0.02 | nd   |
| 274 | 11  | Butylparabe<br>n                 | C11H14O3        | nd | nd | nd | nd | 0.02 | nd | nd | nd   | 0.01 |

|     |     |                    |                                                |    |    |    |    |    |    |    |    |    |
|-----|-----|--------------------|------------------------------------------------|----|----|----|----|----|----|----|----|----|
| 275 | 6.2 | Oxyresveratrol     | C <sub>14</sub> H <sub>12</sub> O <sub>4</sub> | nd | tr | nd |
| 276 | 8.4 | (-)-gallo catechin | C <sub>15</sub> H <sub>14</sub> O <sub>7</sub> | nd | nd | nd | nd | nd | nd | tr | nd | nd |

---

“nd” indicates that the substance was not detected under analytical conditions used; “tr”, trace (<0.01%)

**Supplementary Table S4.** Relative content (%) of bioactive compounds belonging to different biochemical classes in the newly grown leaves of nine wild tree peony species.

|                     | <i>P.<br/>jishanensis</i> | <i>P.<br/>qiui</i> | <i>P.<br/>decomposita</i> | <i>P.ostii</i> | <i>P.rockii</i> | <i>P.lutea</i> | <i>P.<br/>delavayi</i> | <i>P.<br/>ludlowii</i> | <i>P.<br/>potaninii</i> |
|---------------------|---------------------------|--------------------|---------------------------|----------------|-----------------|----------------|------------------------|------------------------|-------------------------|
| Terpenoids          | 63.80                     | 73.62              | 46.66                     | 11.21          | 64.65           | 55.88          | 37.96                  | 69.93                  | 70.01                   |
| Flavonoids          | 33.68                     | 23.30              | 49.53                     | 82.64          | 31.92           | 38.10          | 42.37                  | 22.20                  | 25.28                   |
| Lipids              | 0.23                      | 0.61               | 0.93                      | 1.60           | 1.04            | 1.45           | 3.69                   | 1.90                   | 0.64                    |
| Hydrocarbons        | 0.39                      | 0.51               | 0.68                      | 0.12           | 0.34            | 0.99           | 6.82                   | 0.42                   | 2.12                    |
| Glycosides          | 0.24                      | 0.53               | 0.98                      | 1.51           | 0.26            | 1.09           | 3.32                   | 3.66                   | 0.55                    |
| Carboxylic<br>Acids | 1.43                      | 0.93               | 0.73                      | 1.82           | 1.11            | 1.72           | 3.26                   | 1.10                   | 0.62                    |
| Amino acids         | 0.01                      | 0.02               | 0.04                      | 0.03           | 0.06            | 0.03           | 0.10                   | 0.07                   | 0.38                    |
| Phenolic<br>acids   | 0.00                      | 0.00               | 0.00                      | 0.01           | 0.00            | 0.00           | 0.00                   | 0.00                   | 0.00                    |
| Benzopyrans         | 0.03                      | 0.12               | 0.02                      | 0.09           | 0.11            | 0.14           | 0.14                   | 0.14                   | 0.05                    |
| Quinones            | 0.00                      | 0.00               | 0.01                      | 0.00           | 0.01            | 0.01           | 0.02                   | 0.00                   | 0.01                    |



|                           |      |      |      |      |      |      |      |      |      |
|---------------------------|------|------|------|------|------|------|------|------|------|
| Alkaloids                 | 0.01 | 0.02 | 0.03 | 0.01 | 0.03 | 0.03 | 0.02 | 0.01 | 0.02 |
| Vitamins                  | 0.00 | 0.02 | 0.23 | 0.49 | 0.25 | 0.19 | 0.00 | 0.15 | 0.00 |
| Heterocyclic<br>Compounds | 0.00 | 0.01 | 0.01 | 0.07 | 0.03 | 0.00 | 2.25 | 0.00 | 0.00 |
| Aldehydes                 | 0.02 | 0.03 | 0.08 | 0.03 | 0.05 | 0.00 | 0.02 | 0.02 | 0.00 |
| Ketones                   | 0.09 | 0.27 | 0.06 | 0.26 | 0.12 | 0.31 | 0.00 | 0.34 | 0.25 |
| Others                    | 0.05 | 0.01 | 0.02 | 0.09 | 0.03 | 0.06 | 0.04 | 0.05 | 0.06 |

---

**Supplementary Table S5.** Absolute content (mg/ml) of 42 differential metabolites in newly grown leaves of nine wild tree peony species.

| NO. | RT   | Compound                    | Formula                                         | Class      | Absolute content (mg/ml)                   |                                 |                                 |                                 |                                |                                |                                 |                                 |                               |
|-----|------|-----------------------------|-------------------------------------------------|------------|--------------------------------------------|---------------------------------|---------------------------------|---------------------------------|--------------------------------|--------------------------------|---------------------------------|---------------------------------|-------------------------------|
|     |      |                             |                                                 |            | <i>P. jishanensis</i>                      | <i>P. qiui</i>                  | <i>P. decomposita</i>           | <i>P. ostii</i>                 | <i>P. rockii</i>               | <i>P. lutea</i>                | <i>P. delavayi</i>              | <i>P. ludlowii</i>              | <i>P. potaninii</i>           |
| 1   | 6.24 | Paeoniflorin                | C <sub>23</sub> H <sub>28</sub> O <sub>11</sub> | Terpenoids | 93.330<br>±2.419 <sup>e</sup>              | 101.230<br>±4.616 <sup>de</sup> | 214.293<br>±18.983 <sup>a</sup> | 118.639<br>±7.026 <sup>cd</sup> | 152.795<br>±2.539 <sup>b</sup> | 219.396<br>±1.967 <sup>a</sup> | 138.909<br>±3.575 <sup>bc</sup> | 233.969<br>±5.723 <sup>a</sup>  | 24.415<br>±3.249 <sup>f</sup> |
| 2   | 7.37 | Luteoloside                 | C <sub>21</sub> H <sub>20</sub> O <sub>11</sub> | Flavonoids | 20.279<br>±1.219 <sup>d</sup> <sub>e</sub> | 219.940<br>±7.422 <sup>a</sup>  | 57.737±<br>14.025 <sup>c</sup>  | 12.037±<br>1.646 <sup>e</sup>   | 12.348<br>±0.971 <sup>e</sup>  | 32.506<br>±0.752 <sup>d</sup>  | 16.523±<br>0.701 <sup>de</sup>  | 148.662<br>±9.186 <sup>b</sup>  | 2.939±<br>0.246 <sup>e</sup>  |
| 3   | 7.53 | Hyperin                     | C <sub>21</sub> H <sub>20</sub> O <sub>12</sub> | Flavonoids | 16.905<br>±0.435 <sup>c</sup>              | 61.136±<br>5.971 <sup>b</sup>   | 18.977±<br>1.014 <sup>c</sup>   | 1.341±0<br>.394 <sup>d</sup>    | 3.340±<br>0.457 <sup>d</sup>   | 4.725±<br>0.128 <sup>d</sup>   | 16.322±<br>0.813 <sup>c</sup>   | 103.124<br>±13.084 <sup>a</sup> | 3.314±<br>0.372 <sup>d</sup>  |
| 4   | 5.88 | Kaempferol-3-gentio bioside | C <sub>27</sub> H <sub>30</sub> O <sub>16</sub> | Flavonoids | 2.924±<br>0.253 <sup>bc</sup>              | 11.325±<br>0.918 <sup>a</sup>   | 3.987±2<br>.146 <sup>b</sup>    | 0.315±0<br>.069 <sup>e</sup>    | 1.241±<br>0.041 <sup>de</sup>  | 0 <sup>e</sup>                 | 2.342±0<br>.260 <sup>cd</sup>   | 0 <sup>e</sup>                  | 1.141±<br>0.076 <sup>de</sup> |
| 5   | 9.1  | Quercetin dihydrate         | C <sub>15</sub> H <sub>10</sub> O <sub>7</sub>  | Flavonoids | 1.167±<br>0.163 <sup>b</sup>               | 1.712±0<br>.784 <sup>b</sup>    | 0.397±0<br>.182 <sup>b</sup>    | 0.053±0<br>.005 <sup>b</sup>    | 0.060±<br>0.002 <sup>b</sup>   | 0.379±<br>0.020 <sup>b</sup>   | 1.153±0<br>.101 <sup>b</sup>    | 23.287±<br>3.749 <sup>a</sup>   | 0.383±<br>0.116 <sup>b</sup>  |
| 6   | 9.6  | Luteolin                    | C <sub>15</sub> H <sub>10</sub> O <sub>6</sub>  | Flavonoids | 1.042±<br>0.109 <sup>c</sup>               | 7.781±0<br>.447 <sup>b</sup>    | 2.326±0<br>.151 <sup>c</sup>    | 0.283±0<br>.037 <sup>c</sup>    | 0.332±<br>0.013 <sup>c</sup>   | 2.868±<br>0.112 <sup>c</sup>   | 1.222±0<br>.021 <sup>c</sup>    | 22.451±<br>3.409 <sup>a</sup>   | 0.870±<br>0.094 <sup>c</sup>  |
| 7   | 10   | Isorhamnetin                | C <sub>8</sub> H <sub>8</sub> O <sub>3</sub>    | Flavonoids | 0.820±<br>0.091 <sup>bc</sup>              | 1.601±0<br>.666 <sup>b</sup>    | 0.618±0<br>.787 <sup>bc</sup>   | 0.059±0<br>.031 <sup>c</sup>    | 0.063±<br>0.001 <sup>c</sup>   | 0.176±<br>0.017 <sup>c</sup>   | 0.751±0<br>.012 <sup>bc</sup>   | 6.964±1<br>.209 <sup>a</sup>    | 0.125±<br>0.045 <sup>c</sup>  |
| 8   | 8.07 | Apigenin-7-glucoside        | C <sub>21</sub> H <sub>20</sub> O <sub>10</sub> | Flavonoids | 0.437±<br>0.047 <sup>e</sup>               | 103.290<br>±9.263 <sup>a</sup>  | 73.676±<br>4.831 <sup>b</sup>   | 18.031±<br>3.224 <sup>d</sup>   | 37.842<br>±2.760 <sup>c</sup>  | 26.300<br>±1.726 <sup>d</sup>  | 0.160±0<br>.025 <sup>e</sup>    | 0.518±0<br>.148 <sup>e</sup>    | 8.019±<br>0.887 <sup>e</sup>  |

|    |       |                      |           |                  |                           |                           |                            |                            |                           |                           |                           |                            |                            |
|----|-------|----------------------|-----------|------------------|---------------------------|---------------------------|----------------------------|----------------------------|---------------------------|---------------------------|---------------------------|----------------------------|----------------------------|
| 9  | 8.21  | 7-O-methylmangiferin | C20H20O11 | Ketones          | 0.167±0.005 <sup>bc</sup> | 0.813±0.686 <sup>b</sup>  | 0.306±0.006 <sup>abc</sup> | 0.391±0.056 <sup>abc</sup> | 0.180±0.065 <sup>bc</sup> | 0.836±0.107 <sup>a</sup>  | 0.656±0.009 <sup>ab</sup> | 0 <sup>c</sup>             | 0.154±0.017 <sup>bc</sup>  |
| 10 | 8.1   | Rhoifolin            | C27H30O14 | Flavonoids       | 0.133±0.042 <sup>e</sup>  | 40.571±7.332 <sup>b</sup> | 57.736±6.212 <sup>a</sup>  | 4.755±0.486 <sup>de</sup>  | 13.468±1.889 <sup>c</sup> | 4.858±0.718 <sup>de</sup> | 0.083±0.004 <sup>e</sup>  | 0.819±0.084 <sup>e</sup>   | 11.082±1.389 <sup>cd</sup> |
| 11 | 9.57  | Cantharidin          | C10H12O4  | Flavonoids       | 0.149±0.015 <sup>c</sup>  | 2.271±0.938 <sup>a</sup>  | 1.187±0.144 <sup>b</sup>   | 0.585±0.014 <sup>bc</sup>  | 0.254±0.014 <sup>c</sup>  | 0.980±0.082 <sup>bc</sup> | 0.300±0.017 <sup>c</sup>  | 0.844±0.125 <sup>bc</sup>  | 0.122±0.007 <sup>c</sup>   |
| 12 | 6.15  | Curcigolide          | C22H26O11 | Glycosides       | 0.119±0.004 <sup>b</sup>  | 0.362±0.181 <sup>b</sup>  | 0.159±0.005 <sup>b</sup>   | 0.055±0.010 <sup>b</sup>   | 0.153±0.013 <sup>b</sup>  | 0.198±0.014 <sup>b</sup>  | 0.266±0.041 <sup>b</sup>  | 4.349±1.136 <sup>a</sup>   | 0.128±0.039 <sup>b</sup>   |
| 13 | 1.13  | Gallic acid          | C7H6O5    | Carboxylic Acids | 0.067±0.006 <sup>b</sup>  | 0 <sup>d</sup>            | 0.401±0.012 <sup>a</sup>   | 0.041±0.002 <sup>c</sup>   | 0 <sup>d</sup>            | 0 <sup>d</sup>            | 0 <sup>d</sup>            | 0 <sup>d</sup>             | 0 <sup>d</sup>             |
| 14 | 7.65  | Isovanillin          | C8H8O3    | Aldehydes        | 0.038±0.002 <sup>b</sup>  | 0.300±0.138 <sup>a</sup>  | 0 <sup>b</sup>             | 0.365±0.052 <sup>a</sup>   | 0.079±0.01 <sup>3</sup>   | 0 <sup>b</sup>            | 0 <sup>b</sup>            | 0 <sup>b</sup>             | 0 <sup>b</sup>             |
| 15 | 7.69  | Phloridzin           | C21H24O10 | Glycosides       | 0.028±0.002 <sup>c</sup>  | 0.401±0.295 <sup>b</sup>  | 0.022±0.019 <sup>c</sup>   | 0 <sup>c</sup>             | 0.414±0.011 <sup>b</sup>  | 0 <sup>c</sup>            | 0.151±0.004 <sup>c</sup>  | 0.778±0.050 <sup>a</sup>   | 0.005±0.009 <sup>c</sup>   |
| 16 | 4.96  | Loganin              | C17H26O10 | Terpenoids       | 0.033±0.006 <sup>cd</sup> | 0.256±0.041 <sup>a</sup>  | 0.018±0.031 <sup>cd</sup>  | 0.009±0.016 <sup>cd</sup>  | 0.061±0.005 <sup>bc</sup> | 0.106±0.009 <sup>b</sup>  | 0.266±0.026 <sup>a</sup>  | 0 <sup>d</sup>             | 0 <sup>d</sup>             |
| 17 | 5.36  | Bilobalide           | C15H18O8  | Terpenoids       | 0.026±0.006 <sup>b</sup>  | 0.219±0.111 <sup>b</sup>  | 0.659±0.973 <sup>b</sup>   | 0.046±0.005 <sup>b</sup>   | 0 <sup>b</sup>            | 0.091±0.023 <sup>b</sup>  | 0 <sup>b</sup>            | 9.206±1.558 <sup>a</sup>   | 0.151±0.033 <sup>b</sup>   |
| 18 | 5.92  | Complanatolide       | C28H32O16 | Glycosides       | 0.014±0.006 <sup>bc</sup> | 0.014±0.024 <sup>bc</sup> | 0.030±0.004 <sup>b</sup>   | 0.004±0.004 <sup>c</sup>   | 0.0273±0.002 <sup>b</sup> | 0 <sup>c</sup>            | 0 <sup>c</sup>            | 0.156±0.007 <sup>a</sup>   | 0.001±0.002 <sup>c</sup>   |
| 19 | 17.48 | Curcumin             | C15H20O4  | Terpenoids       | 0.002±0.001 <sup>c</sup>  | 2.656±0.414 <sup>a</sup>  | 0.498±0.049 <sup>c</sup>   | 0.113±0.013 <sup>c</sup>   | 0.233±0.010 <sup>c</sup>  | 1.168±0.034 <sup>b</sup>  | 0.002±0.004 <sup>c</sup>  | 0.006±0.011 <sup>c</sup>   | 1.349±0.359 <sup>b</sup>   |
| 20 | 10.44 | Apigenin             | C15H10O5  | Flavonoids       | 0 <sup>c</sup>            | 0 <sup>c</sup>            | 0.089±0.023 <sup>a</sup>   | 0.082±0.007 <sup>a</sup>   | 0.040±0.012 <sup>b</sup>  | 0 <sup>c</sup>            | 0 <sup>c</sup>            | 0 <sup>c</sup>             | 0 <sup>c</sup>             |
| 21 | 6.11  | Epicatechin gallate  | C22H18O10 | Carboxylic Acids | 0 <sup>b</sup>            | 7.336±2.325 <sup>a</sup>  | 7.978±1.404 <sup>a</sup>   | 0.698±0.139 <sup>b</sup>   | 0.751±0.111 <sup>b</sup>  | 0.291±0.018 <sup>b</sup>  | 0 <sup>b</sup>            | 0 <sup>b</sup>             | 0.129±0.031 <sup>b</sup>   |
| 22 | 8.24  | Spinosin             | C28H32O15 | Flavonoids       | 0 <sup>b</sup>            | 1.006±0.052 <sup>b</sup>  | 0.034±0.059 <sup>b</sup>   | 0 <sup>b</sup>             | 0 <sup>b</sup>            | 0.099±0.023 <sup>b</sup>  | 7.35±0.336 <sup>b</sup>   | 76.139±12.144 <sup>a</sup> | 0.916±1.499 <sup>b</sup>   |

|    |       |                                    |           |                  |                          |                          |                            |                           |                           |                          |                           |                          |                           |
|----|-------|------------------------------------|-----------|------------------|--------------------------|--------------------------|----------------------------|---------------------------|---------------------------|--------------------------|---------------------------|--------------------------|---------------------------|
| 23 | 10.05 | HeteroclitinD                      | C27H30O8  | Hydrocarbons     | 0 <sup>c</sup>           | 0 <sup>c</sup>           | 2.912±0.699 <sup>a</sup>   | 0.904±0.262 <sup>b</sup>  | 0.915±0.042 <sup>b</sup>  | 3.140±0.471 <sup>a</sup> | 0.779±0.025 <sup>bc</sup> | 0 <sup>c</sup>           | 0.263±0.068 <sup>bc</sup> |
| 24 | 15.6  | Harpagide                          | C15H24O10 | Glycosides       | 0.003±0.001 <sup>b</sup> | 0.015±0.005 <sup>b</sup> | 0.012±0.004 <sup>b</sup>   | 0 <sup>b</sup>            | 0 <sup>b</sup>            | 0.003±0.005 <sup>b</sup> | 0.003±0.006 <sup>b</sup>  | 0.096±0.017 <sup>a</sup> | 0 <sup>b</sup>            |
| 25 | 0.01  | Ferulic Acid                       | C10H10O4  | Carboxylic Acids | 0 <sup>b</sup>           | 0 <sup>b</sup>           | 0.001±0.002 <sup>b</sup>   | 0 <sup>b</sup>            | 0.005±0.000 <sup>a</sup>  | 0 <sup>b</sup>           | 0 <sup>b</sup>            | 0 <sup>b</sup>           | 0 <sup>b</sup>            |
| 26 | 1.09  | Malic acid 5-Hydroxymethylfurfural | C4H6O5    | Carboxylic Acids | 0.213±0.035 <sup>b</sup> | 0 <sup>b</sup>           | 0 <sup>b</sup>             | 0.176±0.018 <sup>b</sup>  | 0 <sup>b</sup>            | 0.371±0.020 <sup>b</sup> | 0.907±0.059 <sup>b</sup>  | 5.533±1.069 <sup>a</sup> | 0.191±0.033 <sup>b</sup>  |
| 27 | 1.12  | Bomyl acetate                      | C6H6O3    | Aldehydes        | 0 <sup>c</sup>           | 0.132±0.036 <sup>a</sup> | 0 <sup>c</sup>             | 0.004±0.006 <sup>c</sup>  | 0.047±0.006 <sup>b</sup>  | 0 <sup>c</sup>           | 0 <sup>c</sup>            | 0 <sup>c</sup>           | 0 <sup>c</sup>            |
| 28 | 4.76  | Gentioic acid                      | C12H20O2  | Carboxylic Acids | 0 <sup>a</sup>           | 0 <sup>a</sup>           | 0.003±0.005 <sup>a</sup>   | 0.001±0.002 <sup>a</sup>  | 0.007±0.001 <sup>a</sup>  | 0.002±0.004 <sup>a</sup> | 0.004±0.001 <sup>a</sup>  | 0.007±0.012 <sup>a</sup> | 0 <sup>a</sup>            |
| 29 | 5.69  | 4-Naringenin                       | C16H20O9  | Glycosides       | 0 <sup>b</sup>           | 0 <sup>b</sup>           | 0 <sup>b</sup>             | 0 <sup>b</sup>            | 0 <sup>b</sup>            | 0.125±0.029 <sup>b</sup> | 0.193±0.113 <sup>b</sup>  | 1.321±0.443 <sup>a</sup> | 0.02±0.035 <sup>b</sup>   |
| 30 | 5.71  | Hydroxycoumarin                    | C9H6O3    | Benzopyrans      | 0 <sup>b</sup>           | 0 <sup>b</sup>           | 0 <sup>b</sup>             | 0.001±0.002 <sup>b</sup>  | 0.004±0.000 <sup>a</sup>  | 0 <sup>b</sup>           | 0 <sup>b</sup>            | 0 <sup>b</sup>           | 0 <sup>b</sup>            |
| 31 | 6.69  | Benzoic acid                       | C10H12O5  | Phenolic acids   | 0.001±0.002 <sup>c</sup> | 0.043±0.011 <sup>a</sup> | 0.013±0.003 <sup>b</sup>   | 0.001±0.001 <sup>c</sup>  | 0 <sup>c</sup>            | 0 <sup>c</sup>           | 0 <sup>c</sup>            | 0 <sup>c</sup>           | 0 <sup>c</sup>            |
| 32 | 7.34  | Naringenin                         | C15H12O5  | Flavonoids       | 0.023±0.001 <sup>d</sup> | 0.203±0.030 <sup>b</sup> | 0.114±0.009 <sup>bcd</sup> | 0.056±0.012 <sup>cd</sup> | 0.146±0.038 <sup>bc</sup> | 0.013±0.023 <sup>d</sup> | 0.077±0.006 <sup>cd</sup> | 0.681±0.101 <sup>a</sup> | 0.054±0.012 <sup>cd</sup> |
| 33 | 7.83  | Ellagic Acid                       | C14H6O8   | Benzopyrans      | 0.095±0.031 <sup>b</sup> | 0.206±0.045 <sup>a</sup> | 0 <sup>c</sup>             | 0.163±0.221 <sup>a</sup>  | 0 <sup>c</sup>            | 0.164±0.047 <sup>a</sup> | 0 <sup>c</sup>            | 0 <sup>c</sup>           | 0 <sup>c</sup>            |
| 34 | 8.29  | Epimeredioside A                   | C31H40O15 | Others           | 0 <sup>c</sup>           | 0 <sup>c</sup>           | 0 <sup>c</sup>             | 0 <sup>c</sup>            | 0 <sup>c</sup>            | 0 <sup>c</sup>           | 0.040±0.03 <sup>a</sup>   | 0 <sup>c</sup>           | 0.014±0.002 <sup>b</sup>  |
| 35 | 8.49  | Lobetyolin                         | C20H28O8  | Hydrocarbons     | 0 <sup>a</sup>           | 0.043±0.074 <sup>a</sup> | 0.017±0.030 <sup>a</sup>   | 0.005±0.003 <sup>a</sup>  | 0.009±0.002 <sup>a</sup>  | 0 <sup>a</sup>           | 0 <sup>a</sup>            | 0 <sup>a</sup>           | 0 <sup>a</sup>            |
| 36 | 8.58  | Cichoric acid                      | C22H18O12 | Carboxylic Acids | 0 <sup>a</sup>           | 0 <sup>a</sup>           | 0 <sup>a</sup>             | 0 <sup>a</sup>            | 0.008±0.013 <sup>a</sup>  | 0 <sup>a</sup>           | 0.003±0.001 <sup>a</sup>  | 0 <sup>a</sup>           | 0 <sup>a</sup>            |

|    |       |                  |                                                               |            |                          |                          |                          |                          |                           |                          |                          |                |                           |
|----|-------|------------------|---------------------------------------------------------------|------------|--------------------------|--------------------------|--------------------------|--------------------------|---------------------------|--------------------------|--------------------------|----------------|---------------------------|
| 37 | 9.15  | Dihydroquercetin | C <sub>15</sub> H <sub>12</sub> O <sub>7</sub>                | Flavonoids | 0 <sup>b</sup>           | 0.427±0.171 <sup>a</sup> | 0.295±0.106 <sup>a</sup> | 0 <sup>b</sup>           | 0 <sup>b</sup>            | 0.039±0.068 <sup>b</sup> | 0 <sup>b</sup>           | 0 <sup>b</sup> | 0.0147±0.003 <sup>b</sup> |
| 38 | 9.9   | Benzoylepiflorin | C <sub>30</sub> H <sub>32</sub> O <sub>12</sub>               | Terpenoids | 0 <sup>c</sup>           | 0 <sup>c</sup>           | 0 <sup>c</sup>           | 0.756±0.017 <sup>b</sup> | 1.464±0.028 <sup>a</sup>  | 0 <sup>c</sup>           | 0 <sup>c</sup>           | 0 <sup>c</sup> | 0 <sup>c</sup>            |
| 39 | 10.59 | Diosmetin        | C <sub>16</sub> H <sub>12</sub> O <sub>6</sub>                | Flavonoids | 0 <sup>b</sup>            | 0 <sup>b</sup>           | 0 <sup>b</sup>           | 0 <sup>b</sup> | 0.014±0.002 <sup>a</sup>  |
| 40 | 11.92 | Raspberry ketone | C <sub>10</sub> H <sub>12</sub> O <sub>2</sub>                | Ketones    | 0.001±0.001 <sup>a</sup> | 0.001±0.001 <sup>a</sup> | 0.002±0.004 <sup>a</sup> | 0 <sup>a</sup>           | 0 <sup>a</sup>            | 0 <sup>a</sup>           | 0.008±0.014 <sup>a</sup> | 0 <sup>a</sup> | 0 <sup>a</sup>            |
| 41 | 16.01 | Catharine        | C <sub>21</sub> H <sub>24</sub> N <sub>2</sub> O <sub>2</sub> | Alkaloids  | 0.002±0.003 <sup>a</sup> | 0.008±0.014 <sup>a</sup> | 0 <sup>a</sup>           | 0.004±0.001 <sup>a</sup> | 0 <sup>a</sup>            | 0.004±0.006 <sup>a</sup> | 0 <sup>a</sup>           | 0 <sup>a</sup> | 0 <sup>a</sup>            |
| 42 | 16.23 | Kaurenoic acid   | C <sub>20</sub> H <sub>30</sub> O <sub>2</sub>                | Terpenoids | 0 <sup>c</sup>           | 0 <sup>c</sup>           | 0 <sup>c</sup>           | 0.003±0.001 <sup>b</sup> | 0.001±0.002 <sup>bc</sup> | 0 <sup>c</sup>           | 0.007±0.001 <sup>a</sup> | 0 <sup>c</sup> | 0.001±0.001 <sup>bc</sup> |

**Supplementary Table S6.** Antioxidant properties of the extracts from the newly grown leaves of WTPS ( $n = 3 \pm \text{SD}$ ).

|                       | ABTS<br>(gTE/100g<br>DW) | DPPH<br>(gTE/100g<br>DW) | FRAP<br>(gTE/100g<br>DW) | ORAC<br>(gTE/100g<br>DW) |
|-----------------------|--------------------------|--------------------------|--------------------------|--------------------------|
| <i>P. jishanensis</i> | 38.158±0.66 <sup>b</sup> | 48.68±0.62 <sup>a</sup>  | 20.89±0.72 <sup>b</sup>  | 21.14±0.11 <sup>a</sup>  |
| <i>P. qiui</i>        | 29.00±0.77 <sup>c</sup>  | 17.90±0.16 <sup>e</sup>  | 17.79±1.44 <sup>c</sup>  | 15.24±0.27 <sup>d</sup>  |
| <i>P. decomposita</i> | 27.54±0.26 <sup>de</sup> | 17.59±0.15 <sup>e</sup>  | 13.60±1.20 <sup>d</sup>  | 13.25±0.32 <sup>ef</sup> |
| <i>P. ostii</i>       | 27.96±0.74 <sup>d</sup>  | 37.19±0.73 <sup>c</sup>  | 26.51±0.21 <sup>a</sup>  | 19.47±0.39 <sup>b</sup>  |
| <i>P. rockii</i>      | 29.69±0.27 <sup>c</sup>  | 38.42±0.16 <sup>c</sup>  | 17.67±1.04 <sup>c</sup>  | 16.34±0.33 <sup>c</sup>  |
| <i>P. lutea</i>       | 49.62±0.13 <sup>a</sup>  | 42.39±1.06 <sup>b</sup>  | 26.23±0.10 <sup>a</sup>  | 20.32±0.51 <sup>ab</sup> |
| <i>P. delavayi</i>    | 27.05±0.17 <sup>de</sup> | 30.77±0.40 <sup>d</sup>  | 16.05±0.30 <sup>c</sup>  | 12.34±0.33 <sup>f</sup>  |
| <i>P. ludlowii</i>    | 27.00±0.13 <sup>de</sup> | 21.88±1.78 <sup>d</sup>  | 13.14±0.40 <sup>d</sup>  | 6.70±0.20 <sup>g</sup>   |
| <i>P. potaninii</i>   | 26.72±0.07 <sup>e</sup>  | 36.66±0.57 <sup>c</sup>  | 21.40±0.73 <sup>b</sup>  | 13.38±0.33 <sup>e</sup>  |

Different superscript letters in each column indicate significant differences ( $P < 0.05$ ).

**Supplementary Table S7.** Minimum inhibitory concentrations of the newly grown leaves of nine wild tree peony species against the bacteria tested ( $n = 3$ ).

| Nine WTPS             | Minimum inhibitory concentration (mg/mL) |                      |                 |                         |                      |                |                    |                    |
|-----------------------|------------------------------------------|----------------------|-----------------|-------------------------|----------------------|----------------|--------------------|--------------------|
|                       | <i>S. aureus</i>                         | <i>S.hemolytis-β</i> | <i>P. acnes</i> | <i>L. monocytogenes</i> | <i>P. aeruginosa</i> | <i>E. coli</i> | <i>S. enterica</i> | <i>P. vulgaris</i> |
| <i>P. jishanensis</i> | 1.56                                     | 12.5                 | 3.13            | 3.13                    | 3.13                 | 3.13           | 1.56               | 6.25               |
| <i>P. qiui</i>        | 3.13                                     | 6.25                 | 6.25            | 3.13                    | 3.13                 | 6.25           | 1.56               | 6.25               |
| <i>P. decomposita</i> | 1.56                                     | 6.25                 | 3.13            | 3.13                    | 6.25                 | 6.25           | 6.25               | 6.25               |
| <i>P. ostii</i>       | 0.78                                     | 12.5                 | 3.13            | 1.56                    | 6.25                 | 3.13           | 6.25               | 6.25               |
| <i>P. rockii</i>      | 0.78                                     | 12.5                 | 3.13            | 0.78                    | 12.5                 | 6.25           | 1.56               | 3.13               |
| <i>P. lutea</i>       | 1.56                                     | 12.5                 | 6.25            | 0.78                    | 12.5                 | 12.5           | 3.13               | 3.13               |
| <i>P. delavayi</i>    | 1.56                                     | 25                   | 6.25            | 6.25                    | 12.5                 | 12.5           | 3.13               | 6.25               |
| <i>P. ludlowii</i>    | 3.13                                     | 12.5                 | 12.5            | 6.25                    | 6.25                 | 12.5           | 3.13               | 12.5               |
| <i>P. potaninii</i>   | 1.56                                     | 12.5                 | 3.13            | 3.13                    | 6.25                 | 12.5           | 6.25               | 6.25               |
| Kanamycin             | 0.16                                     | 0.08                 | 2.5             | 0.31                    | 2.5                  | 1.25           | 1.25               | 0.16               |

**Supplementary Table S8.** Absorbance values of different concentrations of gallic acid standard solutions at 765 nm.

| Absorbance values of different concentrations of gallic acid standard solutions at 765 nm |   |       |        |        |        |       |        |      |        |        |
|-------------------------------------------------------------------------------------------|---|-------|--------|--------|--------|-------|--------|------|--------|--------|
| Concentrations of gallic acid standard solutions (mg/ml)                                  | 0 | 0.01  | 0.02   | 0.03   | 0.04   | 0.05  | 0.06   | 0.07 | 0.08   | 0.09   |
| Absorbance values                                                                         | 0 | 0.167 | 0.2457 | 0.3463 | 0.4034 | 0.572 | 0.6661 | 0.77 | 0.8764 | 0.9663 |



**Supplementary Table S9.** Absorbance values of different concentrations of rutin standard solutions at 506 nm.

| Absorbance values of different concentrations of rutin standard solutions at 506 nm |   |        |        |       |        |        |        |        |        |      |
|-------------------------------------------------------------------------------------|---|--------|--------|-------|--------|--------|--------|--------|--------|------|
| Concentrations of rutin standard solutions (mg/ml)                                  | 0 | 0.01   | 0.02   | 0.03  | 0.04   | 0.05   | 0.06   | 0.07   | 0.08   | 0.09 |
| Absorbance values                                                                   | 0 | 0.1109 | 0.1645 | 0.205 | 0.2513 | 0.3004 | 0.3594 | 0.4035 | 0.4297 | 0.48 |

## Supplementary Figures

**Supplementary Figure S1.** DIZ of four Gram-positive bacteria after the application of peony leaf extracts at a concentration of 0.2 mL/cup. Bars = 10 mm. (A) *S. aureus*. (B) *S. hemolytis-β*. (C) *P. acnes*. (D) *L. monocytogenes*. (I) *P. jishanensis*. (II) *P. qiui*. (III) *P. decomposita*. (IV) *P. ostii*. (V) *P. rockii*. (VI) *P. lutea*. (VII) *P. delavayi*. (VIII) *P. ludlowii*. (IX) *P. potaninii*. (1) Replicate 1. (2) Replicate 2. (3) Replicate 3. (4) Negative controls (Methanol). (5) Positive controls (Kanamycin).

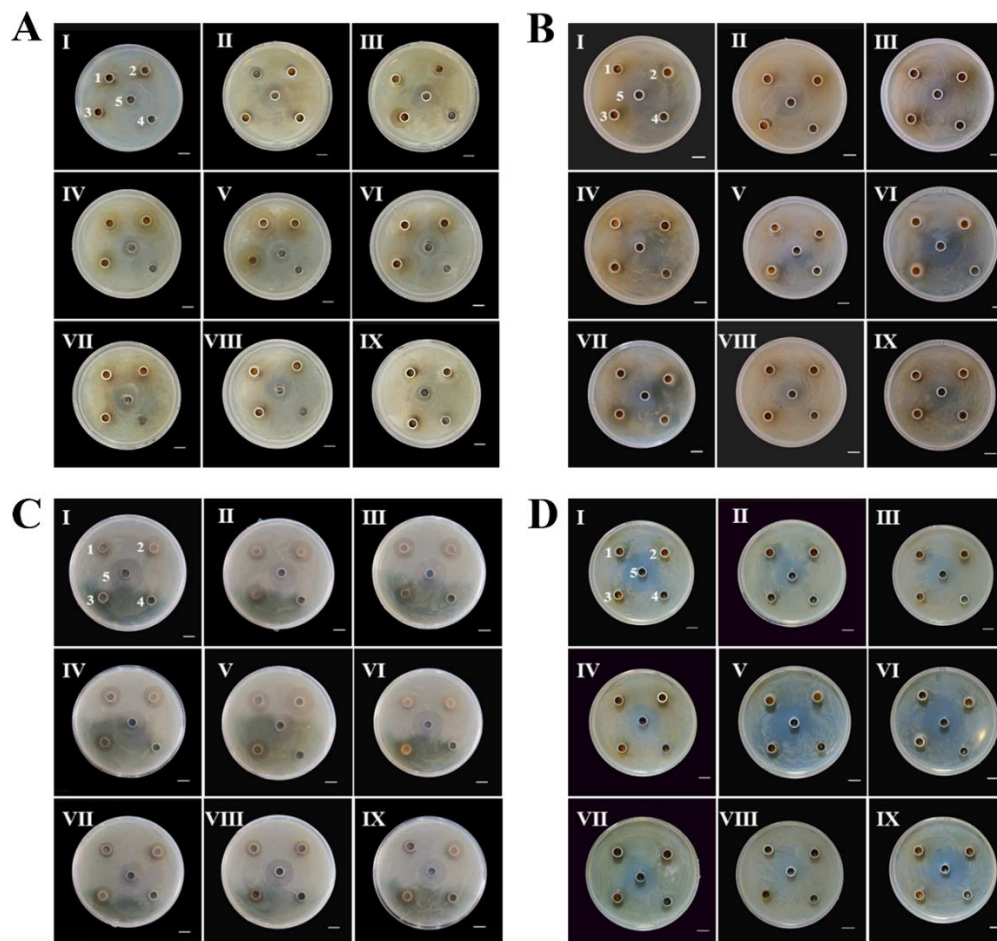

**Supplementary Figure S2.** DIZ of four Gram-negative bacteria after the application of peony leaf extracts at a concentration of 0.2 mL/cup. Bars = 10 mm. (A) *P. aeruginosa*. (B) *E. coli*. (C) *P. vulgaris*. (D) *S. enterica*. (I) *P. jishanensis*. (II) *P. qiui*. (III) *P. decomposita*. (IV) *P. ostii*. (V) *P. rockii*. (VI) *P. lutea*. (VII) *P. delavayi*. (VIII) *P. ludlowii*. (IX) *P. potaninii*. (1) Replicate 1. (2) Replicate 2. (3) Replicate 3. (4) Negative controls (Methanol). (5) Positive controls (Kanamycin).

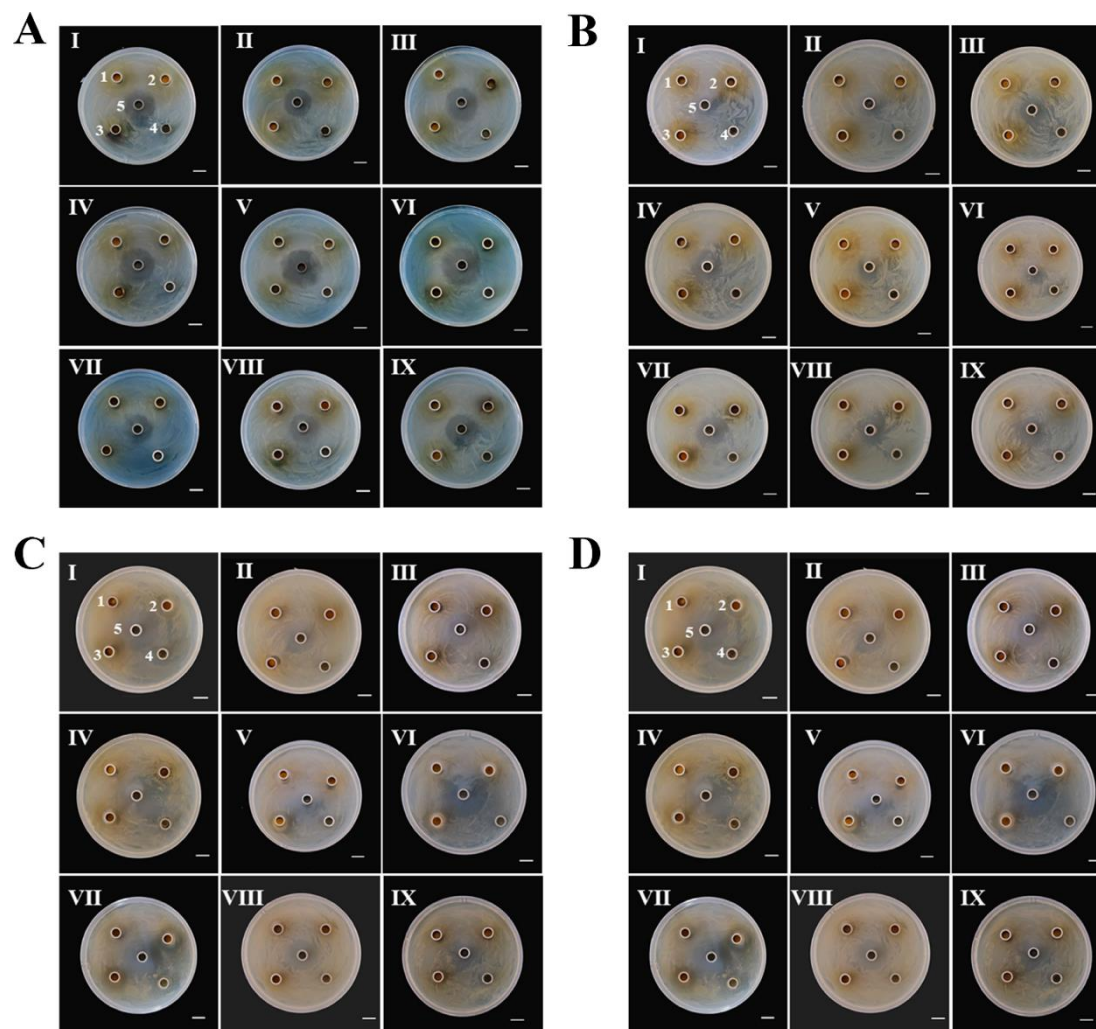

**Supplementary Figure S3.** The regression curves with different concentrations of gallic acid standard solutions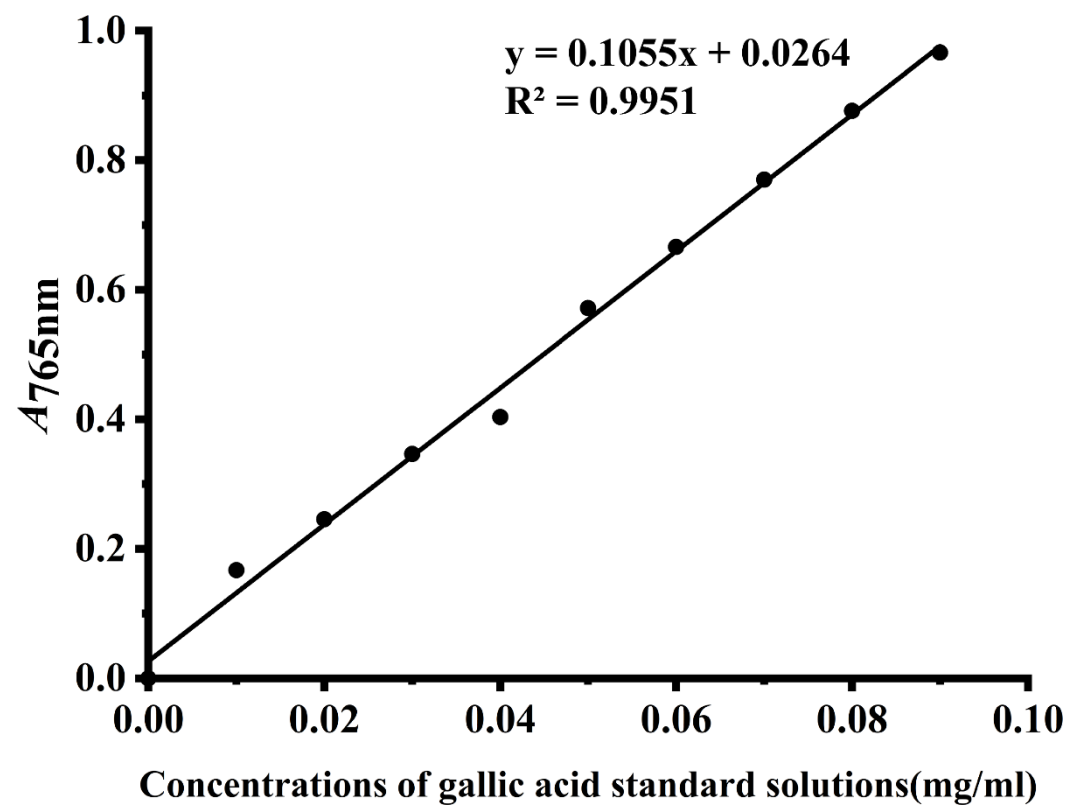

**Supplementary Figure S4.** The regression curves with different concentrations of rutin standard solutions

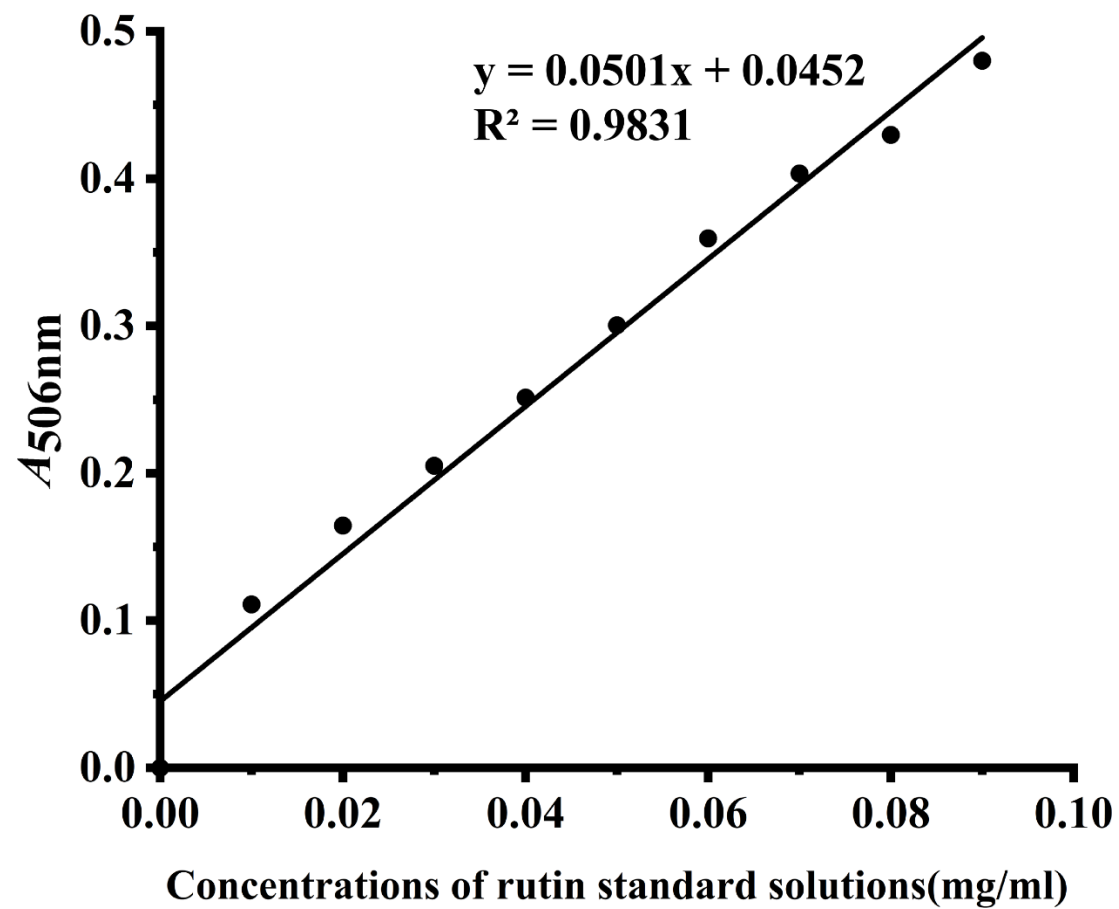

Supplement: s1 [file s1]
